# Supplementary material for: A Phase 1B Clinical Study of Combretastatin A1 Diphosphate (OXi4503) and Cytarabine (ARA-C) in Combination (OXA) for Patients with Relapsed or Refractory Acute Myeloid Leukemia
Source: PubMed Central journal article supplement (PMC7016810; doi:10.3390/cancers12010074), 2019-12-26
Supplement: cancers-12-00074-s001.pdf [file cancers-12-00074-s001.pdf]

## Supplementary Materials

# A Phase 1B Clinical Study of Combretastatin A1 Diphosphate (OXi4503) and Cytarabine (ARA-C) in Combination (OXA) for Patients with Relapsed or Refractory Acute Myeloid Leukemia

Fatih M. Uckun, Christopher R. Cogle, Tara L. Lin, Sanjive Qazi, Vuong N. Trieu and Gary Schiller, Justin Watts

Table S1: OX1222 Phase I Study Patients Treated with OXi4503 in combination with Cytarabine (OXA) according to dose cohorts of OXi4503.

|              | Cohorts                |                        |                        |                        |                        |                        |
|--------------|------------------------|------------------------|------------------------|------------------------|------------------------|------------------------|
|              | 1                      | 2                      | 3                      | 4                      | 5                      | 6                      |
|              | 3.75 mg/m <sup>2</sup> | 4.68 mg/m <sup>2</sup> | 6.25 mg/m <sup>2</sup> | 7.81 mg/m <sup>2</sup> | 9.76 mg/m <sup>2</sup> | 12.2 mg/m <sup>2</sup> |
|              | 101-002                | 103-005                | 101-005                | 101-006                | 101-007                | 103-012                |
|              | 103-002                | 103-008                | 103-009                | 103-010                | 103-011                | 103-013                |
|              | 103-003                | 106-005                | 107-001                | 106-008                | 106-009                | 106-010                |
|              | 103-004                | 106-006                | 107-002                |                        | 107-003                | 106-011                |
|              | 106-001                |                        |                        |                        | 107-004                |                        |
|              | 106-003                |                        |                        |                        | 107-007                |                        |
|              | 106-004                |                        |                        |                        | 107-008                |                        |
| <b>Total</b> | <b>7</b>               | <b>4</b>               | <b>4</b>               | <b>3</b>               | <b>7</b>               | <b>4</b>               |

**Table S2.** Patient Characteristics and Demographic Features for Safety Population Treated with OXA in OX1222 Study (N = 29).

| Patient ID | Cohort | Diagnosis | Age/Sex/Race | Previous Therapies (Number; List) | Cellularity                               | Bone Marrow Involvement               |                     | Treatment Outcome                                     |                            |             |                        |                          |                            |                |        |
|------------|--------|-----------|--------------|-----------------------------------|-------------------------------------------|---------------------------------------|---------------------|-------------------------------------------------------|----------------------------|-------------|------------------------|--------------------------|----------------------------|----------------|--------|
|            |        |           |              |                                   |                                           | Percent Myeloblasts by Morphology/FCM | Karyotype/Mutations | Best Overall Response                                 | Time to Progression (days) | CID1 to EOS | Other Therapy post EOS | Time to Death or Last FU | Survival Status at last FU | Cause of death |        |
| 101-002    | 1      | 2         | AML          | 61/M/C                            | 4: IDAC;MCC; CECA;5AZA                    | 95                                    | 30/25               | t(11;15)(MLL-R;FLT3 int(3)(q21q36.2), del(5)(q)PTPN11 | PD                         | 28          | 28                     | HU                       | 30                         | D              | PD     |
| 106-004    | 1      | 4         | AML          | 59/M/C                            | 5: 7+3;HiDAC;5-AC;IP;PBSCT                | NR                                    | 25/20               |                                                       | CRi                        | 54+         | 54                     | DLI                      | 535                        | D              | PD     |
| 103-004    | 1      | 2         | AML          | 68/M/B                            | 2: IDAC;ME                                | 90                                    | 60/-                | 46,XY,NPM1,JAK2, TP53                                 | SD/RES                     | 106         | 29                     | NR                       | 106                        | D              | PD     |
| 103-002    | 1      | 2         | AML          | 31/F/B                            | 5: 7+3;HiDAC;ME;5AZA;CAFdA-C              | NR                                    | 27/-                | t(4;15)(t9-11), MLL-R/NRAS                            | PD                         | 16          | 30                     | NR                       | 77                         | D              | PD     |
| 103-003    | 1      | 2         | AML          | 26/F/M*                           | 5: IDAC;7+3+2-CD4;ME;5-AC+NEXAVAR         | 70                                    | 40/31               | t(7;12)(FLT3-ITD,WT1                                  | PD                         | 29          | 33                     | NR                       | 87                         | D              | PD     |
| 106-001    | 1      | 1         | AML          | 64/F/C                            | 6: 7+3;HiDAC;ALLO PSCT;URD PBSCT, 5AZA;IP | 20                                    | 38/-                | 45-48,XX,t(1;1)NR                                     | PD                         | 22          | 30                     | NR                       | 172                        | D              | PD     |
| 106-003    | 1      | 2         | AML          | 61/F/C                            | 3:7+3;MEC;5AZA                            | 20                                    | 12                  | t(12;15),dic(8;11),-5,-13,-11/NR                      | NE                         | NE          | 4                      | NR/LFU                   | 40                         | D              | NR/LFU |
| 106-005    | 2      | 2         | MDS/RAEB-2   | 31/M/C                            | 2: Allo PSCT;5-AC                         | 30                                    | 9/8                 | t(2;5),t(5;14)/WT1                                    | PD                         | 24          | 61                     | 7+3;HU                   | 285                        | D              | PD     |
| 106-006    | 2      | 4         | AML          | 65/M/C                            | 1: 5AZA                                   | 20-30                                 | 9/8                 | 46,XY,+8(FISH)/NR                                     | CRi                        | 64+         | 64                     | Mylotarg 5-AC            | 521                        | D              | PD     |
| 103-005    | 2      | 4         | AML          | 60/M/C                            | 4:HDAC;HiDAC;CECA;5-AC                    | NR                                    | 5-10                | NR/IDH2                                               | PD                         | 57          | 57                     | CAFFdA                   | 212                        | D              | PD     |
| 103-008    | 2      | 2         | AML          | 59/M/C                            | 5: 7+3;HiDAC;ME;5-AC;REV                  | 90                                    | 58                  | del(5)(q),-21/ASXL1                                   | SD/RES                     | 48          | 33                     | None                     | 48                         | D              | PD     |
| 101-005    | 3      | 2         | AML          | 66/M/B                            | 2: IDAC;CECA                              | -5                                    | 1                   | del(6)(p)                                             | PD                         | 29          | 32                     | Jakafi                   | 119                        | D              | PD     |
| 103-009    | 3      | 4         | AML          | 66/M/C                            | 1: 5-AC;DAUNO                             | 20-70                                 | 15*                 | del(5)(q),del(7)(q)/TP53                              | CR                         | 78+         | 78                     | 5AZA                     | 434                        | D              | PD     |
| 107-001    | 3      | 6         | AML          | 60/M/C                            | 2: IDAC;UBC-SCT                           | 80                                    | 90/76               | Hx: del(5)(q)/ Hx: RUNX1, WT1                         | PD                         | 89          | 96                     | IP                       | 191                        | D              | NR     |
| 107-002    | 3      | 4         | AML          | 38/F/C                            | 2: 7+3; ALLO-PBSCT                        | 20-30                                 | 65/59               | -7, MLL-R (FISH)/PTPN11                               | SD/RES                     | NA          | 59                     | NA                       | 59                         | D              | IFI    |
| 106-008    | 4      | 4         | AML          | 77/F/C                            | 2: 7+3; 5AZA                              | 80-90                                 | 89/65               | 46, XX                                                | PR                         | NA          | 61                     | NA                       | 61                         | D              | IFI    |
| 103-010    | 4      | 2         | AML          | 67/M/C                            | 3: IDAC;HiDAC;ME                          | 90                                    | 90/-                | 49,XY,+4,+8,+14,Del(4)(q)/ NPM1,KIT,DNMT3A            | SD/RES                     | 135         | 29                     | 5-AC, NEXAVAR            | 135                        | D              | PD     |
| 101-006    | 4      | 2         | AML          | 61/M/C                            | 2: 5-AC;IDAC                              | 30                                    | 10-12/16            | del(5)(q)/PTPN11                                      | SD/RES                     | 113         | 29                     | Velcade, HU              | 113                        | D              | PD     |
| 106-009    | 5      | 2         | AML          | 74/F/C                            | 3: IDAC;HiDAC                             | 40                                    | 18/6                | NR/NR                                                 | PD                         | 28          | 35                     | 5AZA                     | 232                        | D              | NR/HOS |

  

| Patient ID | Cohort | Diagnosis | Age/Sex/Race | Previous Therapies (Number; List) | Cellularity                                                | Bone Marrow Involvement               |                     | Treatment Outcome             |                            |             |                        |                          |                            |                |    |
|------------|--------|-----------|--------------|-----------------------------------|------------------------------------------------------------|---------------------------------------|---------------------|-------------------------------|----------------------------|-------------|------------------------|--------------------------|----------------------------|----------------|----|
|            |        |           |              |                                   |                                                            | Percent Myeloblasts by Morphology/FCM | Karyotype/Mutations | Best Overall Response         | Time to Progression (days) | CID1 to EOS | Other Therapy post EOS | Time to Death or Last FU | Survival Status at last FU | Cause of death |    |
| 107-003    | 5      | 6         | AML          | 68/M/C                            | 1: 7+3                                                     | 60                                    | 15/9                | t(16;16)CBFB-R,KRAS           | CR                         | 228+        | NA                     | Allo PBSCT               | 720                        | A              | NA |
| 103-011    | 5      | 2         | MDS/RCMD     | 78/M/C                            | 1: 5-AC                                                    | 10-30                                 | 15/20               | 45,XY,-7                      | SD/RES                     | 298         | 43                     | LDAC                     | 298                        | D              | PD |
| 101-007    | 5      | 2         | AML          | 33/M/C                            | 2: IDAC;CECA                                               | 20-40                                 | 50/41               | t(5;11)(q35;p15)/FLT3-ITD*    | PD                         | 33          | 35                     | NR                       | 393                        | D              | PD |
| 107-004    | 5      | 2         | AML          | 56/F/C                            | 2: 5AZA;Lipo-DAUNO-C                                       | NR                                    | 64                  | del(11)(q),-7                 | PD                         | 25          | 114                    | NA                       | 114                        | D              | PD |
| 107-007    | 5      | 1         | AML          | 65/F/C                            | 2: 5AZA; Busulfan                                          | 50                                    | 20                  | Del(5)(q), del(21)(q)         | PD                         | 27          | 69                     | NA                       | 69                         | D              | PD |
| 107-008    | 5      | 2         | AML          | 61/F/C                            | NR                                                         | NR                                    | NR                  | -17,del(22)(q),del(7)(q)/TP53 | PD                         | 66          | 66                     | NA                       | 66                         | D              | PD |
| 103-012    | 6      | 2         | AML          | 54/F/H                            | 3: 2-CD4+DAUNO;aCD33-Calicheamicin/Mylotarg+MITO; Mylotarg | 50                                    | 60                  | NR/NR                         | PD                         | 27          | 34                     | -                        | 34                         | D              | PD |
| 103-013    | 6      | 2         | AML          | 60/M/H                            | 2: Lipo-DAUNO-C; 5AZA                                      | 60                                    | NA                  | t(6;11)BRAF,KRAS,CEBPA        | PD                         | 29          | 29                     | -                        | 77                         | D              | PD |
| 106-010    | 6      | 5         | AML          | 66/M/C                            | 2: Lipo-DAUNO-C 5-AC                                       | NR                                    | 57                  | NR/NR                         | SD/RES                     | 127         | 64                     | NR/LFU                   | 127                        | D              | NR |
| 106-011    | 6      | 2         | AML          | 41/F/-                            | 6:Busulfan;ARA-C; M-CTX; M-C; 5AZA;HU                      | 90                                    | 52                  | NR/NR                         | PD                         | 18          | 18                     | NR/LFU                   | 58                         | D              | PD |

CID1: Cycle 1 Day 1; FU: Follow-up; AML: acute myelogenous leukemia; MDS: Myelodysplastic Syndromes; PD: Progressive disease; CR i: Complete response with incomplete hematologic recovery; PR: Partial response; SD/RES: Stable disease/Refractory; NE: Not evaluable; CR: Complete response; A: Alive; D: Dead; EOS: End of Study; NA: Not available; SAE: serious adverse event; HU: hydroxyurea; DLI: donor leukocyte infusion; 5-AC: 5-Azacytidine; PBSCT: Peripheral blood stem cell transplantation; SCT: stem cell transplant; 5AZA: deoxyazacytidine. IFI: Invasive fungal infection.

**Table S3.** Incidence of adverse events of all grades by MedDRA PT (any CTCAE Grade) occurring in patients treated with OXA in Study OX1222 regardless of any relationship with the study drug OXi4503.

| MedDRA SOC<br>MedDRA PT                     | Cohorts                   |                           |                           |                           |                           |                           | Total<br>N = 29<br>n (%) |
|---------------------------------------------|---------------------------|---------------------------|---------------------------|---------------------------|---------------------------|---------------------------|--------------------------|
|                                             | 3.75<br>mg/m <sup>2</sup> | 4.68<br>mg/m <sup>2</sup> | 6.25<br>mg/m <sup>2</sup> | 7.81<br>mg/m <sup>2</sup> | 9.76<br>mg/m <sup>2</sup> | 12.2<br>mg/m <sup>2</sup> |                          |
| <b>Blood and lymphatic system disorders</b> |                           |                           |                           |                           |                           |                           |                          |
| Anemia                                      | 4                         | 2                         | 1                         | 1                         | 2                         | 1                         | 11 (37.9)                |
| Disseminated intravascular coagulation      | 0                         | 0                         | 0                         | 0                         | 0                         | 1                         | 1 (3.4)                  |
| Febrile neutropenia (FN)                    | 3                         | 3                         | 4                         | 3                         | 3                         | 3                         | 19 (65.5)                |
| Leukocytosis                                | 1                         | 0                         | 0                         | 0                         | 0                         | 0                         | 1 (3.4)                  |
| Lymph node pain                             | 1                         | 0                         | 0                         | 0                         | 0                         | 0                         | 1 (3.4)                  |
| Neutropenia (does not include FN report)    | 0                         | 1                         | 0                         | 0                         | 1                         | 0                         | 2 (6.9)                  |
| Pancytopenia                                | 1                         | 0                         | 1                         | 0                         | 0                         | 0                         | 2 (6.9)                  |
| Thrombocytopenia                            | 0                         | 1                         | 0                         | 0                         | 0                         | 0                         | 1 (3.4)                  |
| <b>Cardiac disorders</b>                    |                           |                           |                           |                           |                           |                           |                          |
| Sinus bradycardia                           | 1                         | 0                         | 0                         | 0                         | 0                         | 0                         | 1 (3.4)                  |
| Sinus tachycardia                           | 0                         | 0                         | 0                         | 1                         | 0                         | 0                         | 1 (3.4)                  |
| Tachycardia                                 | 1                         | 1                         | 1                         | 1                         | 2                         | 0                         | 6 (20.7)                 |
| <b>Eye disorders</b>                        |                           |                           |                           |                           |                           |                           |                          |
| Blepharitis                                 | 0                         | 0                         | 1                         | 0                         | 0                         | 0                         | 1 (3.4)                  |
| Conjunctival hemorrhage                     | 1                         | 0                         | 0                         | 0                         | 0                         | 0                         | 1 (3.4)                  |
| Dry eye                                     | 1                         | 0                         | 0                         | 0                         | 0                         | 0                         | 1 (3.4)                  |
| Keratitis                                   | 0                         | 0                         | 1                         | 0                         | 0                         | 0                         | 1 (3.4)                  |
| Eye swelling                                | 0                         | 0                         | 1                         | 0                         | 0                         | 0                         | 1 (3.4)                  |
| Visual impairment                           | 0                         | 0                         | 1                         | 0                         | 0                         | 0                         | 1 (3.4)                  |
| <b>Gastrointestinal disorders</b>           |                           |                           |                           |                           |                           |                           |                          |
| Abdominal distension                        | 0                         | 0                         | 1                         | 0                         | 0                         | 0                         | 1 (3.4)                  |
| Abdominal pain                              | 1                         | 0                         | 1                         | 1                         | 0                         | 0                         | 3 (10.3)                 |
| Abdominal tenderness                        | 1                         | 0                         | 0                         | 0                         | 0                         | 0                         | 1 (3.4)                  |
| Anal pruritus                               | 0                         | 0                         | 0                         | 1                         | 0                         | 0                         | 1 (3.4)                  |
| Bowel movement irregularity                 | 0                         | 1                         | 0                         | 0                         | 0                         | 0                         | 1 (3.4)                  |
| Constipation                                | 1                         | 2                         | 1                         | 0                         | 3                         | 0                         | 7 (24.1)                 |
| Diarrhea                                    | 3                         | 1                         | 3                         | 1                         | 1                         | 1                         | 10 (34.5)                |
| Dyspepsia                                   | 0                         | 1                         | 0                         | 1                         | 0                         | 0                         | 2 (6.9)                  |
| Flatulence                                  | 0                         | 1                         | 0                         | 1                         | 0                         | 0                         | 2 (6.9)                  |
| Gingival disorder                           | 1                         | 0                         | 0                         | 0                         | 0                         | 0                         | 1 (3.4)                  |
| Hematochezia                                | 1                         | 0                         | 0                         | 0                         | 0                         | 0                         | 1 (3.4)                  |
| Hemorrhoidal hemorrhage                     | 0                         | 0                         | 1                         | 0                         | 0                         | 0                         | 1 (3.4)                  |
| Hemorrhoids                                 | 0                         | 1                         | 1                         | 1                         | 0                         | 1                         | 4 (13.8)                 |
| Large intestinal hemorrhage                 | 0                         | 0                         | 0                         | 0                         | 1                         | 0                         | 1 (3.4)                  |
| Lip ulceration                              | 0                         | 0                         | 1                         | 0                         | 0                         | 0                         | 1 (3.4)                  |
| Nausea                                      | 4                         | 2                         | 1                         | 2                         | 3                         | 1                         | 13 (44.8)                |
| Oral pain                                   | 0                         | 0                         | 2                         | 0                         | 0                         | 0                         | 2 (6.9)                  |
| Pancreatitis acute                          | 1                         | 0                         | 0                         | 0                         | 0                         | 0                         | 1 (3.4)                  |

| MedDRA SOC<br>MedDRA PT                                     | Cohorts                   |                           |                           |                           |                           |                           | Total           |
|-------------------------------------------------------------|---------------------------|---------------------------|---------------------------|---------------------------|---------------------------|---------------------------|-----------------|
|                                                             | 3.75<br>mg/m <sup>2</sup> | 4.68<br>mg/m <sup>2</sup> | 6.25<br>mg/m <sup>2</sup> | 7.81<br>mg/m <sup>2</sup> | 9.76<br>mg/m <sup>2</sup> | 12.2<br>mg/m <sup>2</sup> | N = 29<br>n (%) |
| Proctalgia                                                  | 0                         | 0                         | 1                         | 0                         | 0                         | 0                         | 1 (3.4)         |
| Proctitis                                                   | 0                         | 1                         | 0                         | 0                         | 0                         | 0                         | 1 (3.4)         |
| Rectal hemorrhage                                           | 0                         | 0                         | 1                         | 0                         | 0                         | 0                         | 1 (3.4)         |
| Stomatitis                                                  | 1                         | 1                         | 0                         | 0                         | 1                         | 1                         | 4 (13.8)        |
| Tongue ulceration                                           | 0                         | 1                         | 0                         | 0                         | 0                         | 0                         | 1 (3.4)         |
| Toothache                                                   | 1                         | 0                         | 0                         | 0                         | 0                         | 0                         | 1 (3.4)         |
| Vomiting                                                    | 3                         | 0                         | 1                         | 1                         | 2                         | 0                         | 7 (24.1)        |
| <b>General disorders and administration site conditions</b> |                           |                           |                           |                           |                           |                           |                 |
| Asthenia                                                    | 2                         | 0                         | 0                         | 0                         | 0                         | 1                         | 3 (10.3)        |
| Axillary pain                                               | 1                         | 0                         | 0                         | 0                         | 0                         | 0                         | 1 (3.4)         |
| Catheter site hemorrhage                                    | 1                         | 0                         | 0                         | 0                         | 0                         | 0                         | 1 (3.4)         |
| Chills                                                      | 0                         | 0                         | 3                         | 1                         | 2                         | 1                         | 7 (24.1)        |
| Fatigue                                                     | 4                         | 1                         | 0                         | 1                         | 0                         | 0                         | 6 (20.7)        |
| Influenza like illness                                      | 0                         | 1                         | 0                         | 0                         | 0                         | 0                         | 1 (3.4)         |
| Infusion site erythema                                      | 0                         | 0                         | 0                         | 0                         | 1                         | 0                         | 1 (3.4)         |
| Infusion site pruritus                                      | 0                         | 0                         | 0                         | 0                         | 1                         | 0                         | 1 (3.4)         |
| Infusion site thrombosis                                    | 0                         | 0                         | 0                         | 0                         | 1                         | 0                         | 1 (3.4)         |
| Localized edema                                             | 0                         | 0                         | 1                         | 0                         | 0                         | 0                         | 1 (3.4)         |
| Malaise                                                     | 2                         | 0                         | 0                         | 0                         | 0                         | 0                         | 2 (6.9)         |
| Edema                                                       | 1                         | 0                         | 0                         | 0                         | 0                         | 0                         | 1 (3.4)         |
| Edema peripheral                                            | 0                         | 0                         | 0                         | 2                         | 1                         | 1                         | 4 (13.8)        |
| Pain                                                        | 0                         | 0                         | 0                         | 1                         | 0                         | 1                         | 2 (6.9)         |
| Peripheral swelling                                         | 1                         | 0                         | 0                         | 0                         | 0                         | 0                         | 1 (3.4)         |
| Pyrexia                                                     | 1                         | 1                         | 2                         | 0                         | 0                         | 0                         | 4 (13.8)        |
| <b>Hepatobiliary disorders</b>                              |                           |                           |                           |                           |                           |                           |                 |
| Cholecystitis                                               | 1                         | 0                         | 0                         | 0                         | 0                         | 0                         | 1 (3.4)         |
| <b>Infections and infestations</b>                          |                           |                           |                           |                           |                           |                           |                 |
| Atypical pneumonia                                          | 0                         | 0                         | 0                         | 1                         | 0                         | 0                         | 1 (3.4)         |
| Bacteremia                                                  | 0                         | 0                         | 1                         | 1                         | 0                         | 0                         | 2 (6.9)         |
| Bacterial infection                                         | 0                         | 2                         | 0                         | 0                         | 0                         | 0                         | 2 (6.9)         |
| Bronchopulmonary aspergillosis                              | 0                         | 0                         | 1                         | 0                         | 0                         | 0                         | 1 (3.4)         |
| Candida infection                                           | 0                         | 0                         | 1                         | 0                         | 0                         | 0                         | 1 (3.4)         |
| Cellulitis                                                  | 1                         | 1                         | 0                         | 0                         | 0                         | 0                         | 2 (6.9)         |
| Clostridium difficile infection                             | 0                         | 0                         | 0                         | 0                         | 1                         | 0                         | 1 (3.4)         |
| Enterococcal infection                                      | 1                         | 0                         | 0                         | 0                         | 0                         | 0                         | 1 (3.4)         |
| Escherichia bacteremia                                      | 0                         | 1                         | 0                         | 0                         | 0                         | 0                         | 1 (3.4)         |
| Liver abscess                                               | 1                         | 0                         | 0                         | 0                         | 0                         | 0                         | 1 (3.4)         |
| Oral herpes                                                 | 0                         | 0                         | 0                         | 1                         | 0                         | 0                         | 1 (3.4)         |
| Periorbital cellulitis                                      | 1                         | 0                         | 0                         | 0                         | 0                         | 0                         | 1 (3.4)         |
| Perirectal abscess                                          | 0                         | 0                         | 0                         | 1                         | 0                         | 0                         | 1 (3.4)         |
| Pneumonia                                                   | 0                         | 1                         | 0                         | 0                         | 0                         | 2                         | 3 (10.3)        |
| Pneumonia klebsiella bacteremia                             | 0                         | 0                         | 0                         | 0                         | 1                         | 0                         | 1 (3.4)         |

| MedDRA SOC<br>MedDRA PT                               | Cohorts                   |                           |                           |                           |                           |                           | Total<br>N = 29<br>n (%) |
|-------------------------------------------------------|---------------------------|---------------------------|---------------------------|---------------------------|---------------------------|---------------------------|--------------------------|
|                                                       | 3.75<br>mg/m <sup>2</sup> | 4.68<br>mg/m <sup>2</sup> | 6.25<br>mg/m <sup>2</sup> | 7.81<br>mg/m <sup>2</sup> | 9.76<br>mg/m <sup>2</sup> | 12.2<br>mg/m <sup>2</sup> |                          |
| Sepsis                                                | 0                         | 0                         | 0                         | 0                         | 1                         | 0                         | 1 (3.4)                  |
| Sinusitis fungal                                      | 0                         | 0                         | 0                         | 1                         | 0                         | 0                         | 1 (3.4)                  |
| Staphylococcal infection                              | 1                         | 0                         | 1                         | 0                         | 0                         | 0                         | 2 (6.9)                  |
| Streptococcal bacteremia                              | 0                         | 0                         | 0                         | 0                         | 1                         | 0                         | 1 (3.4)                  |
| <b>Injury, poisoning and procedural complications</b> |                           |                           |                           |                           |                           |                           |                          |
| Contusion                                             | 1                         | 0                         | 0                         | 0                         | 0                         | 0                         | 1 (3.4)                  |
| Fall                                                  | 0                         | 0                         | 0                         | 1                         | 0                         | 0                         | 1 (3.4)                  |
| Wound                                                 | 0                         | 1                         | 0                         | 0                         | 0                         | 0                         | 1 (3.4)                  |
| Infusion related reaction                             | 0                         | 0                         | 0                         | 0                         | 0                         | 2                         | 2 (6.9)                  |
| <b>Investigations</b>                                 |                           |                           |                           |                           |                           |                           |                          |
| Activated partial thromboplastin time prolonged       | 1                         | 0                         | 0                         | 0                         | 0                         | 0                         | 1 (3.4)                  |
| Alanine aminotransferase increased                    | 1                         | 0                         | 0                         | 0                         | 1                         | 1                         | 3 (10.3)                 |
| Aspartate aminotransferase increased                  | 1                         | 0                         | 0                         | 1                         | 0                         | 2                         | 4 (13.8)                 |
| Blood alkaline phosphatase increased                  | 0                         | 0                         | 0                         | 0                         | 0                         | 1                         | 1 (3.4)                  |
| Blood bilirubin increased                             | 0                         | 0                         | 0                         | 1                         | 0                         | 1                         | 2 (6.9)                  |
| Blood creatinine increased                            | 0                         | 1                         | 0                         | 1                         | 0                         | 1                         | 3 (10.3)                 |
| Blood fibrinogen decreased                            | 2                         | 0                         | 0                         | 1                         | 1                         | 1                         | 5 (17.2)                 |
| Blood potassium decreased                             | 0                         | 0                         | 1                         | 0                         | 0                         | 0                         | 1 (3.4)                  |
| Breath sounds abnormal                                | 0                         | 1                         | 0                         | 0                         | 0                         | 0                         | 1 (3.4)                  |
| Ejection fraction decreased                           | 0                         | 0                         | 0                         | 1                         | 0                         | 0                         | 1 (3.4)                  |
| Electrocardiogram QT prolonged                        | 0                         | 0                         | 1                         | 1                         | 0                         | 0                         | 2 (6.9)                  |
| Fibrin D-dimer increased                              | 0                         | 0                         | 0                         | 0                         | 1                         | 0                         | 1 (3.4)                  |
| International normalized ratio increased              | 0                         | 1                         | 0                         | 1                         | 0                         | 0                         | 2 (6.9)                  |
| Lipase increased                                      | 1                         | 0                         | 0                         | 0                         | 0                         | 0                         | 1 (3.4)                  |
| Neutrophil count decreased                            | 2                         | 0                         | 0                         | 1                         | 1                         | 0                         | 4 (13.8)                 |
| Platelet count decreased                              | 2                         | 2                         | 0                         | 1                         | 1                         | 1                         | 7 (24.1)                 |
| Prothrombin time prolonged                            | 1                         | 0                         | 0                         | 0                         | 0                         | 0                         | 1 (3.4)                  |
| Transaminases increased                               | 0                         | 0                         | 1                         | 0                         | 0                         | 0                         | 1 (3.4)                  |
| White blood cell count decreased                      | 0                         | 0                         | 0                         | 1                         | 1                         | 0                         | 2 (6.9)                  |
| White blood cell count increased                      | 1                         | 0                         | 0                         | 0                         | 0                         | 0                         | 1 (3.4)                  |
| <b>Metabolism and nutrition disorders</b>             |                           |                           |                           |                           |                           |                           |                          |
| Decreased appetite                                    | 0                         | 0                         | 0                         | 2                         | 0                         | 0                         | 2 (6.9)                  |
| Dehydration                                           | 1                         | 0                         | 0                         | 0                         | 0                         | 0                         | 1 (3.4)                  |
| Fluid overload                                        | 0                         | 0                         | 0                         | 0                         | 1                         | 0                         | 1 (3.4)                  |
| Hyperammonemia                                        | 0                         | 0                         | 0                         | 0                         | 0                         | 1                         | 1 (3.4)                  |
| Hyperchloremia                                        | 1                         | 0                         | 0                         | 0                         | 0                         | 0                         | 1 (3.4)                  |
| Hyperglycemia                                         | 0                         | 0                         | 2                         | 0                         | 0                         | 0                         | 2 (6.9)                  |
| Hyperkalemia                                          | 0                         | 1                         | 0                         | 0                         | 0                         | 0                         | 1 (3.4)                  |
| Hypermagnesemia                                       | 1                         | 0                         | 0                         | 0                         | 0                         | 0                         | 1 (3.4)                  |
| Hyperuricemia                                         | 1                         | 0                         | 0                         | 1                         | 0                         | 0                         | 2 (6.9)                  |

| MedDRA SOC<br>MedDRA PT                                | Cohorts                   |                           |                           |                           |                           |                           | Total           |
|--------------------------------------------------------|---------------------------|---------------------------|---------------------------|---------------------------|---------------------------|---------------------------|-----------------|
|                                                        | 3.75<br>mg/m <sup>2</sup> | 4.68<br>mg/m <sup>2</sup> | 6.25<br>mg/m <sup>2</sup> | 7.81<br>mg/m <sup>2</sup> | 9.76<br>mg/m <sup>2</sup> | 12.2<br>mg/m <sup>2</sup> | N = 29<br>n (%) |
| Hypocalcemia                                           | 0                         | 1                         | 0                         | 0                         | 0                         | 0                         | 1 (3.4)         |
| Hypokalemia                                            | 2                         | 1                         | 1                         | 1                         | 0                         | 0                         | 5 (17.2)        |
| Hypomagnesemia                                         | 0                         | 0                         | 0                         | 0                         | 0                         | 1                         | 1 (3.4)         |
| Hyponatremia                                           | 0                         | 1                         | 0                         | 1                         | 0                         | 0                         | 2 (6.9)         |
| Hypophosphatemia                                       | 1                         | 0                         | 1                         | 1                         | 0                         | 0                         | 3 (10.3)        |
| Metabolic acidosis                                     | 0                         | 0                         | 1                         | 0                         | 0                         | 0                         | 1 (3.4)         |
| <b>Musculoskeletal and connective tissue disorders</b> |                           |                           |                           |                           |                           |                           |                 |
| Arthralgia                                             | 0                         | 1                         | 0                         | 0                         | 0                         | 0                         | 1 (3.4)         |
| Back pain                                              | 2                         | 1                         | 1                         | 1                         | 0                         | 0                         | 5 (17.2)        |
| Bone pain                                              | 0                         | 0                         | 2                         | 1                         | 1                         | 1                         | 5 (17.2)        |
| Muscle spasms                                          | 0                         | 1                         | 0                         | 0                         | 0                         | 0                         | 1 (3.4)         |
| Musculoskeletal stiffness                              | 0                         | 0                         | 0                         | 0                         | 1                         | 0                         | 1 (3.4)         |
| Neck pain                                              | 0                         | 0                         | 0                         | 0                         | 1                         | 0                         | 1 (3.4)         |
| Pain in jaw                                            | 0                         | 0                         | 0                         | 0                         | 2                         | 0                         | 2 (6.9)         |
| <b>Nervous system disorders</b>                        |                           |                           |                           |                           |                           |                           |                 |
| Cerebrovascular accident                               | 0                         | 0                         | 0                         | 1                         | 0                         | 0                         | 1 (3.4)         |
| Cognitive disorder                                     | 0                         | 0                         | 0                         | 1                         | 0                         | 0                         | 1 (3.4)         |
| Dizziness                                              | 1                         | 0                         | 0                         | 2                         | 0                         | 0                         | 3 (10.3)        |
| Dysarthria                                             | 0                         | 0                         | 0                         | 0                         | 0                         | 1                         | 1 (3.4)         |
| Embolic stroke                                         | 0                         | 0                         | 0                         | 1                         | 0                         | 0                         | 1 (3.4)         |
| Facial paresis                                         | 0                         | 0                         | 0                         | 1                         | 0                         | 0                         | 1 (3.4)         |
| Headache                                               | 1                         | 0                         | 1                         | 1                         | 2                         | 3                         | 8 (27.6)        |
| Hypoesthesia                                           | 0                         | 1                         | 0                         | 0                         | 0                         | 0                         | 1 (3.4)         |
| Neuropathy peripheral                                  | 0                         | 0                         | 1                         | 0                         | 0                         | 0                         | 1 (3.4)         |
| Tremor                                                 | 0                         | 0                         | 0                         | 0                         | 0                         | 1                         | 1 (3.4)         |
| Sinus headache                                         | 0                         | 0                         | 0                         | 0                         | 0                         | 1                         | 1 (3.4)         |
| <b>Psychiatric disorders</b>                           |                           |                           |                           |                           |                           |                           |                 |
| Adjustment disorder with depressed mood                | 1                         | 0                         | 0                         | 0                         | 0                         | 0                         | 1 (3.4)         |
| Anxiety                                                | 1                         | 2                         | 0                         | 0                         | 0                         | 0                         | 3 (10.3)        |
| Confusional state                                      | 0                         | 0                         | 0                         | 0                         | 0                         | 1                         | 1 (3.4)         |
| Delirium                                               | 0                         | 0                         | 0                         | 0                         | 0                         | 1                         | 1 (3.4)         |
| Depression                                             | 0                         | 0                         | 0                         | 0                         | 1                         | 0                         | 1 (3.4)         |
| Insomnia                                               | 3                         | 1                         | 0                         | 0                         | 0                         | 0                         | 4 (13.8)        |
| <b>Renal and urinary disorders</b>                     |                           |                           |                           |                           |                           |                           |                 |
| Acute kidney injury                                    | 0                         | 2                         | 0                         | 0                         | 0                         | 0                         | 2 (6.9)         |
| Urinary hesitation                                     | 0                         | 0                         | 0                         | 1                         | 0                         | 0                         | 1 (3.4)         |
| Urinary incontinence                                   | 0                         | 0                         | 0                         | 0                         | 0                         | 1                         | 1 (3.4)         |
| Urinary retention                                      | 0                         | 0                         | 0                         | 1                         | 0                         | 0                         | 1 (3.4)         |
| <b>Respiratory, thoracic and mediastinal disorders</b> |                           |                           |                           |                           |                           |                           |                 |
| Atelectasis                                            | 0                         | 0                         | 0                         | 1                         | 0                         | 0                         | 1 (3.4)         |
| Cough                                                  | 1                         | 1                         | 0                         | 1                         | 0                         | 0                         | 3 (10.3)        |
| Dyspnea                                                | 0                         | 1                         | 1                         | 0                         | 0                         | 0                         | 2 (6.9)         |
| Dyspnea exertional                                     | 1                         | 0                         | 0                         | 1                         | 0                         | 0                         | 2 (6.9)         |

| MedDRA SOC<br>MedDRA PT                       | Cohorts                   |                           |                           |                           |                           |                           | Total<br>N = 29<br>n (%) |
|-----------------------------------------------|---------------------------|---------------------------|---------------------------|---------------------------|---------------------------|---------------------------|--------------------------|
|                                               | 3.75<br>mg/m <sup>2</sup> | 4.68<br>mg/m <sup>2</sup> | 6.25<br>mg/m <sup>2</sup> | 7.81<br>mg/m <sup>2</sup> | 9.76<br>mg/m <sup>2</sup> | 12.2<br>mg/m <sup>2</sup> |                          |
| Epistaxis                                     | 1                         | 0                         | 0                         | 1                         | 2                         | 0                         | 4 (13.8)                 |
| Hemoptysis                                    | 0                         | 0                         | 0                         | 1                         | 0                         | 0                         | 1 (3.4)                  |
| Hypoxia                                       | 0                         | 0                         | 1                         | 0                         | 1                         | 1                         | 3 (10.3)                 |
| Nasal congestion                              | 0                         | 0                         | 1                         | 0                         | 0                         | 0                         | 1 (3.4)                  |
| Oropharyngeal pain                            | 0                         | 1                         | 1                         | 0                         | 1                         | 0                         | 3 (10.3)                 |
| Pleural effusion                              | 0                         | 1                         | 2                         | 0                         | 0                         | 0                         | 3 (10.3)                 |
| Pulmonary mass                                | 0                         | 0                         | 1                         | 0                         | 0                         | 0                         | 1 (3.4)                  |
| Pulmonary edema                               | 0                         | 0                         | 0                         | 1                         | 0                         | 1                         | 2 (6.9)                  |
| Pulmonary vascular<br>resistance abnormality  | 0                         | 0                         | 1                         | 0                         | 0                         | 0                         | 1 (3.4)                  |
| Respiratory failure                           | 0                         | 0                         | 0                         | 0                         | 0                         | 1                         | 1 (3.4)                  |
| Tachypnea                                     | 0                         | 1                         | 0                         | 0                         | 0                         | 0                         | 1 (3.4)                  |
| <b>Skin and subcutaneous tissue disorders</b> |                           |                           |                           |                           |                           |                           |                          |
| Ecchymosis                                    | 0                         | 0                         | 1                         | 0                         | 1                         | 0                         | 2 (6.9)                  |
| Eczema                                        | 1                         | 0                         | 0                         | 0                         | 0                         | 0                         | 1 (3.4)                  |
| Erythema                                      | 1                         | 0                         | 0                         | 0                         | 0                         | 0                         | 1 (3.4)                  |
| Night sweats                                  | 0                         | 0                         | 1                         | 0                         | 0                         | 0                         | 1 (3.4)                  |
| Petechiae                                     | 0                         | 0                         | 1                         | 0                         | 0                         | 0                         | 1 (3.4)                  |
| Pruritus                                      | 0                         | 0                         | 0                         | 1                         | 1                         | 0                         | 2 (6.9)                  |
| Rash                                          | 1                         | 0                         | 0                         | 1                         | 0                         | 0                         | 2 (6.9)                  |
| Rash macular                                  | 1                         | 0                         | 0                         | 0                         | 0                         | 0                         | 1 (3.4)                  |
| Rash maculo-papular                           | 0                         | 0                         | 0                         | 0                         | 2                         | 0                         | 2 (6.9)                  |
| Skin mass                                     | 1                         | 0                         | 0                         | 0                         | 0                         | 0                         | 1 (3.4)                  |
| Skin ulcer                                    | 0                         | 0                         | 0                         | 0                         | 1                         | 0                         | 1 (3.4)                  |
| <b>Vascular disorders</b>                     |                           |                           |                           |                           |                           |                           |                          |
| Deep vein thrombosis                          | 1                         | 0                         | 0                         | 0                         | 0                         | 0                         | 1 (3.4)                  |
| Hematoma                                      | 1                         | 0                         | 0                         | 0                         | 0                         | 0                         | 1 (3.4)                  |
| Hypertension                                  | 2                         | 0                         | 1                         | 1                         | 2                         | 2                         | 8 (27.6)                 |
| Hypotension                                   | 3                         | 0                         | 0                         | 0                         | 0                         | 1                         | 4 (13.8)                 |
| Orthostatic hypertension                      | 0                         | 0                         | 0                         | 1                         | 0                         | 0                         | 1 (3.4)                  |
| Orthostatic hypotension                       | 0                         | 0                         | 0                         | 1                         | 0                         | 0                         | 1 (3.4)                  |
| Systolic hypertension                         | 0                         | 0                         | 0                         | 0                         | 1                         | 0                         | 1 (3.4)                  |
| Thrombophlebitis                              | 1                         | 0                         | 0                         | 0                         | 0                         | 0                         | 1 (3.4)                  |

Note: When the same event was reported twice for the same patient, it was only counted once, and the highest grade was captured.

**Table S4.** Incidence of adverse events CTCAE Grade 3-5 by MedDRA PT occurring in patients treated with OXA in Study OX1222 regardless of any relationship with the study drug OXi4503.

| MedDRA SOC<br>MedDRA PT                                     | Cohorts                   |                           |                           |                           |                           |                           | Total<br>N = 29<br>n (%) |
|-------------------------------------------------------------|---------------------------|---------------------------|---------------------------|---------------------------|---------------------------|---------------------------|--------------------------|
|                                                             | 3.75<br>mg/m <sup>2</sup> | 4.68<br>mg/m <sup>2</sup> | 6.25<br>mg/m <sup>2</sup> | 7.81<br>mg/m <sup>2</sup> | 9.76<br>mg/m <sup>2</sup> | 12.2<br>mg/m <sup>2</sup> |                          |
| <b>Blood and lymphatic system disorders</b>                 |                           |                           |                           |                           |                           |                           |                          |
| <b>Anemia</b>                                               | 4                         | 2                         | 1                         | 1                         | 2                         | 1                         | 11 (37.9)                |
| Grade 3                                                     | 3                         | 2                         | 1                         | 1                         | 2                         | 1                         | 10 (34.5)                |
| Grade 4                                                     | 1                         | 0                         | 0                         | 0                         | 0                         | 0                         | 1 (3.4)                  |
| <b>Febrile neutropenia</b>                                  | 3                         | 3                         | 4                         | 3                         | 3                         | 3                         | 19 (65.5)                |
| Grade 3                                                     | 3                         | 3                         | 4                         | 3                         | 3                         | 3                         | 19 (65.5)                |
| <b>Leukocytosis</b>                                         | 1                         | 0                         | 0                         | 0                         | 0                         | 0                         | 1 (3.4)                  |
| Grade 5                                                     | 1                         | 0                         | 0                         | 0                         | 0                         | 0                         | 1 (3.4)                  |
| <b>Neutropenia</b>                                          | 0                         | 1                         | 0                         | 0                         | 1                         | 0                         | 2 (6.9)                  |
| Grade 4                                                     | 0                         | 1                         | 0                         | 0                         | 1                         | 0                         | 2 (6.9)                  |
| <b>Pancytopenia</b>                                         | 1                         | 0                         | 0                         | 0                         | 0                         | 0                         | 1 (3.4)                  |
| Grade 4                                                     | 1                         | 0                         | 0                         | 0                         | 0                         | 0                         | 1 (3.4)                  |
| <b>Thrombocytopenia</b>                                     | 0                         | 1                         | 0                         | 0                         | 0                         | 0                         | 1 (3.4)                  |
| Grade 4                                                     | 0                         | 1                         | 0                         | 0                         | 0                         | 0                         | 1 (3.4)                  |
| <b>Cardiac disorders</b>                                    |                           |                           |                           |                           |                           |                           |                          |
| <b>Tachycardia</b>                                          | 1                         | 0                         | 0                         | 0                         | 1                         | 0                         | 2 (6.9)                  |
| Grade 3                                                     | 1                         | 0                         | 0                         | 0                         | 1                         | 0                         | 2 (6.9)                  |
| <b>Gastrointestinal disorders</b>                           |                           |                           |                           |                           |                           |                           |                          |
| <b>Rectal hemorrhage</b>                                    | 0                         | 0                         | 1                         | 0                         | 0                         | 0                         | 1 (3.4)                  |
| Grade 3                                                     | 0                         | 0                         | 1                         | 0                         | 0                         | 0                         | 1 (3.4)                  |
| <b>Stomatitis</b>                                           | 1                         | 0                         | 0                         | 0                         | 0                         | 0                         | 1 (3.4)                  |
| Grade 3                                                     | 1                         | 0                         | 0                         | 0                         | 0                         | 0                         | 1 (3.4)                  |
| <b>General disorders and administration site conditions</b> |                           |                           |                           |                           |                           |                           |                          |
| <b>Fatigue</b>                                              | 1                         | 0                         | 0                         | 0                         | 0                         | 0                         | 1 (3.4)                  |
| Grade 3                                                     | 1                         | 0                         | 0                         | 0                         | 0                         | 0                         | 1 (3.4)                  |
| <b>Infections and infestations</b>                          |                           |                           |                           |                           |                           |                           |                          |
| <b>Atypical pneumonia</b>                                   | 0                         | 0                         | 0                         | 1                         | 0                         | 0                         | 1 (3.4)                  |
| Grade 3                                                     | 0                         | 0                         | 0                         | 1                         | 0                         | 0                         | 1 (3.4)                  |
| <b>Bacteremia</b>                                           | 0                         | 0                         | 1                         | 1                         | 0                         | 0                         | 2 (6.9)                  |
| Grade 3                                                     | 0                         | 0                         | 1                         | 1                         | 0                         | 0                         | 2 (6.9)                  |
| <b>Bacterial infection</b>                                  | 0                         | 1                         | 0                         | 0                         | 0                         | 0                         | 1 (3.4)                  |
| Grade 3                                                     | 0                         | 1                         | 0                         | 0                         | 0                         | 0                         | 1 (3.4)                  |
| <b>Bronchopulmonary aspergillosis</b>                       | 0                         | 0                         | 1                         | 0                         | 0                         | 0                         | 1 (3.4)                  |
| Grade 5                                                     | 0                         | 0                         | 1                         | 0                         | 0                         | 0                         | 1 (3.4)                  |
| <b>Cellulitis</b>                                           | 0                         | 1                         | 0                         | 0                         | 0                         | 0                         | 1 (3.4)                  |
| Grade 3                                                     | 0                         | 1                         | 0                         | 0                         | 0                         | 0                         | 1 (3.4)                  |
| <b>Liver abscess</b>                                        | 1                         | 0                         | 0                         | 0                         | 0                         | 0                         | 1 (3.4)                  |



| MedDRA SOC<br>MedDRA PT                         | Cohorts                   |                           |                           |                           |                           |                           | Total<br>N = 29<br>n (%) |
|-------------------------------------------------|---------------------------|---------------------------|---------------------------|---------------------------|---------------------------|---------------------------|--------------------------|
|                                                 | 3.75<br>mg/m <sup>2</sup> | 4.68<br>mg/m <sup>2</sup> | 6.25<br>mg/m <sup>2</sup> | 7.81<br>mg/m <sup>2</sup> | 9.76<br>mg/m <sup>2</sup> | 12.2<br>mg/m <sup>2</sup> |                          |
| Grade 3                                         | 1                         | 0                         | 0                         | 0                         | 0                         | 0                         | 1 (3.4)                  |
| <b>Periorbital cellulitis</b>                   | <b>1</b>                  | <b>0</b>                  | <b>0</b>                  | <b>0</b>                  | <b>0</b>                  | <b>0</b>                  | <b>1 (3.4)</b>           |
| Grade 3                                         | 1                         | 0                         | 0                         | 0                         | 0                         | 0                         | 1 (3.4)                  |
| <b>Perirectal abscess</b>                       | <b>0</b>                  | <b>0</b>                  | <b>0</b>                  | <b>1</b>                  | <b>0</b>                  | <b>0</b>                  | <b>1 (3.4)</b>           |
| Grade 3                                         | 0                         | 0                         | 0                         | 1                         | 0                         | 0                         | 1 (3.4)                  |
| <b>Pneumonia</b>                                | <b>0</b>                  | <b>0</b>                  | <b>0</b>                  | <b>0</b>                  | <b>0</b>                  | <b>2</b>                  | <b>2 (6.9)</b>           |
| Grade 3                                         | 0                         | 0                         | 0                         | 0                         | 0                         | 2                         | 2 (6.9)                  |
| <b>Pneumonia klebsiella<br/>bacteremia</b>      | <b>0</b>                  | <b>0</b>                  | <b>0</b>                  | <b>0</b>                  | <b>1</b>                  | <b>0</b>                  | <b>1 (3.4)</b>           |
| Grade 3                                         | 0                         | 0                         | 0                         | 0                         | 1                         | 0                         | 1 (3.4)                  |
| <b>Sepsis</b>                                   | <b>0</b>                  | <b>0</b>                  | <b>0</b>                  | <b>0</b>                  | <b>1</b>                  | <b>0</b>                  | <b>1 (3.4)</b>           |
| Grade 4                                         | 0                         | 0                         | 0                         | 0                         | 1                         | 0                         | 1 (3.4)                  |
| <b>Sinusitis fungal</b>                         | <b>0</b>                  | <b>0</b>                  | <b>0</b>                  | <b>1</b>                  | <b>0</b>                  | <b>0</b>                  | <b>1 (3.4)</b>           |
| Grade 5                                         | 0                         | 0                         | 0                         | 1                         | 0                         | 0                         | 1 (3.4)                  |
| <b>Streptococcal bacteremia</b>                 | <b>0</b>                  | <b>0</b>                  | <b>0</b>                  | <b>0</b>                  | <b>1</b>                  | <b>0</b>                  | <b>1 (3.4)</b>           |
| Grade 3                                         | 0                         | 0                         | 0                         | 0                         | 1                         | 0                         | 1 (3.4)                  |
| <b>Investigations</b>                           |                           |                           |                           |                           |                           |                           |                          |
| <b>Alanine aminotransferase<br/>increased</b>   | <b>0</b>                  | <b>0</b>                  | <b>0</b>                  | <b>0</b>                  | <b>1</b>                  | <b>1</b>                  | <b>2 (6.9)</b>           |
| Grade 3                                         | 0                         | 0                         | 0                         | 0                         | 1                         | 1                         | 2 (6.9)                  |
| <b>Aspartate aminotransferase<br/>increased</b> | <b>1</b>                  | <b>0</b>                  | <b>0</b>                  | <b>0</b>                  | <b>0</b>                  | <b>1</b>                  | <b>2 (6.9)</b>           |
| Grade 3                                         | 1                         | 0                         | 0                         | 0                         | 0                         | 1                         | 2 (6.9)                  |
| <b>Blood alkaline phosphatase<br/>increased</b> | <b>0</b>                  | <b>0</b>                  | <b>0</b>                  | <b>0</b>                  | <b>0</b>                  | <b>1</b>                  | <b>1 (3.4)</b>           |
| Grade 3                                         | 0                         | 0                         | 0                         | 0                         | 0                         | 1                         | 1 (3.4)                  |
| <b>Blood bilirubin increased</b>                | <b>0</b>                  | <b>0</b>                  | <b>0</b>                  | <b>0</b>                  | <b>0</b>                  | <b>1</b>                  | <b>1 (3.4)</b>           |
| Grade 3                                         | 0                         | 0                         | 0                         | 0                         | 0                         | 1                         | 1 (3.4)                  |
| <b>Blood fibrinogen decreased</b>               | <b>1</b>                  | <b>0</b>                  | <b>0</b>                  | <b>0</b>                  | <b>0</b>                  | <b>0</b>                  | <b>1 (3.4)</b>           |
| Grade 3                                         | 1                         | 0                         | 0                         | 0                         | 0                         | 0                         | 1 (3.4)                  |
| <b>Ejection fraction decreased</b>              | <b>0</b>                  | <b>0</b>                  | <b>0</b>                  | <b>1</b>                  | <b>0</b>                  | <b>0</b>                  | <b>1 (3.4)</b>           |
| Grade 3                                         | 0                         | 0                         | 0                         | 1                         | 0                         | 0                         | 1 (3.4)                  |
| <b>Lipase increased</b>                         | <b>1</b>                  | <b>0</b>                  | <b>0</b>                  | <b>0</b>                  | <b>0</b>                  | <b>0</b>                  | <b>1 (3.4)</b>           |
| Grade 3                                         | 1                         | 0                         | 0                         | 0                         | 0                         | 0                         | 1 (3.4)                  |
| <b>Neutrophil count decreased</b>               | <b>2</b>                  | <b>0</b>                  | <b>0</b>                  | <b>1</b>                  | <b>1</b>                  | <b>0</b>                  | <b>4 (13.8)</b>          |
| Grade 3                                         | 1                         | 0                         | 0                         | 0                         | 1                         | 0                         | 2 (6.9)                  |
| Grade 4                                         | 1                         | 0                         | 0                         | 1                         | 0                         | 0                         | 2 (6.9)                  |
| <b>Platelet count decreased</b>                 | <b>2</b>                  | <b>2</b>                  | <b>0</b>                  | <b>1</b>                  | <b>1</b>                  | <b>1</b>                  | <b>7 (24.1)</b>          |
| Grade 3                                         | 0                         | 0                         | 0                         | 0                         | 1                         | 0                         | 1 (3.4)                  |
| Grade 4                                         | 2                         | 2                         | 0                         | 1                         | 0                         | 1                         | 6 (20.7)                 |
| <b>Prothrombin time prolonged</b>               | <b>1</b>                  | <b>0</b>                  | <b>0</b>                  | <b>0</b>                  | <b>0</b>                  | <b>0</b>                  | <b>1 (3.4)</b>           |
| Grade 3                                         | 1                         | 0                         | 0                         | 0                         | 0                         | 0                         | 1 (3.4)                  |
| <b>White blood cell count<br/>decreased</b>     | <b>0</b>                  | <b>0</b>                  | <b>0</b>                  | <b>1</b>                  | <b>1</b>                  | <b>0</b>                  | <b>2 (6.9)</b>           |
| Grade 4                                         | 0                         | 0                         | 0                         | 1                         | 1                         | 0                         | 1 (3.4)                  |
| <b>White blood cell count<br/>increased</b>     | <b>1</b>                  | <b>0</b>                  | <b>0</b>                  | <b>0</b>                  | <b>0</b>                  | <b>0</b>                  | <b>1 (3.4)</b>           |

| MedDRA SOC<br>MedDRA PT                                | Cohorts                   |                           |                           |                           |                           |                           | Total<br>N = 29<br>n (%) |
|--------------------------------------------------------|---------------------------|---------------------------|---------------------------|---------------------------|---------------------------|---------------------------|--------------------------|
|                                                        | 3.75<br>mg/m <sup>2</sup> | 4.68<br>mg/m <sup>2</sup> | 6.25<br>mg/m <sup>2</sup> | 7.81<br>mg/m <sup>2</sup> | 9.76<br>mg/m <sup>2</sup> | 12.2<br>mg/m <sup>2</sup> |                          |
| Grade 3                                                | 1                         | 0                         | 0                         | 0                         | 0                         | 0                         | 1 (3.4)                  |
| <b>Metabolism and nutrition disorders</b>              |                           |                           |                           |                           |                           |                           |                          |
| <b>Dehydration</b>                                     | 1                         | 0                         | 0                         | 0                         | 0                         | 0                         | 1 (3.4)                  |
| Grade 3                                                | 1                         | 0                         | 0                         | 0                         | 0                         | 0                         | 1 (3.4)                  |
| <b>Hyperglycemia</b>                                   | 0                         | 0                         | 1                         | 0                         | 0                         | 0                         | 1 (3.4)                  |
| Grade 3                                                | 0                         | 0                         | 1                         | 0                         | 0                         | 0                         | 1 (3.4)                  |
| <b>Hypermagnesemia</b>                                 | 1                         | 0                         | 0                         | 0                         | 0                         | 0                         | 1 (3.4)                  |
| Grade 3                                                | 1                         | 0                         | 0                         | 0                         | 0                         | 0                         | 1 (3.4)                  |
| <b>Hyperuricemia</b>                                   | 1                         | 0                         | 0                         | 0                         | 0                         | 0                         | 1 (3.4)                  |
| Grade 4                                                | 1                         | 0                         | 0                         | 0                         | 0                         | 0                         | 1 (3.4)                  |
| <b>Hypokalemia</b>                                     | 2                         | 1                         | 0                         | 0                         | 0                         | 0                         | 3 (10.3)                 |
| Grade 3                                                | 1                         | 1                         | 0                         | 0                         | 0                         | 0                         | 2 (6.9)                  |
| Grade 4                                                | 1                         | 0                         | 0                         | 0                         | 0                         | 0                         | 1 (3.4)                  |
| <b>Hyponatremia</b>                                    | 0                         | 0                         | 0                         | 1                         | 0                         | 0                         | 1 (3.4)                  |
| Grade 3                                                | 0                         | 0                         | 0                         | 1                         | 0                         | 0                         | 1 (3.4)                  |
| <b>Hypophosphatemia</b>                                | 1                         | 0                         | 1                         | 0                         | 0                         | 0                         | 2 (6.9)                  |
| Grade 3                                                | 0                         | 0                         | 1                         | 0                         | 0                         | 0                         | 1 (3.4)                  |
| Grade 4                                                | 1                         | 0                         | 0                         | 0                         | 0                         | 0                         | 1 (3.4)                  |
| <b>Musculoskeletal and connective tissue disorders</b> |                           |                           |                           |                           |                           |                           |                          |
| <b>Back pain</b>                                       | 1                         | 0                         | 0                         | 0                         | 0                         | 0                         | 1 (3.4)                  |
| Grade 3                                                | 1                         | 0                         | 0                         | 0                         | 0                         | 0                         | 1 (3.4)                  |
| <b>Nervous system disorders</b>                        |                           |                           |                           |                           |                           |                           |                          |
| <b>Cognitive disorder</b>                              | 0                         | 0                         | 0                         | 1                         | 0                         | 0                         | 1 (3.4)                  |
| Grade 3                                                | 0                         | 0                         | 0                         | 1                         | 0                         | 0                         | 1 (3.4)                  |
| <b>Dysarthria</b>                                      | 0                         | 0                         | 0                         | 0                         | 0                         | 1                         | 1 (3.4)                  |
| Grade 3                                                | 0                         | 0                         | 0                         | 0                         | 0                         | 1                         | 1 (3.4)                  |
| <b>Embolic stroke</b>                                  | 0                         | 0                         | 0                         | 1                         | 0                         | 0                         | 1 (3.4)                  |
| Grade 4                                                | 0                         | 0                         | 0                         | 1                         | 0                         | 0                         | 1 (3.4)                  |
| <b>Facial paresis</b>                                  | 0                         | 0                         | 0                         | 1                         | 0                         | 0                         | 1 (3.4)                  |
| Grade 3                                                | 0                         | 0                         | 0                         | 1                         | 0                         | 0                         | 1 (3.4)                  |
| <b>Renal and urinary disorders</b>                     |                           |                           |                           |                           |                           |                           |                          |
| <b>Acute kidney injury</b>                             | 0                         | 1                         | 0                         | 0                         | 0                         | 0                         | 1 (3.4)                  |
| Grade 4                                                | 0                         | 1                         | 0                         | 0                         | 0                         | 0                         | 1 (3.4)                  |
| <b>Respiratory, thoracic and mediastinal disorders</b> |                           |                           |                           |                           |                           |                           |                          |
| <b>Hypoxia</b>                                         | 0                         | 0                         | 1                         | 0                         | 1                         | 1                         | 3 (10.3)                 |
| Grade 3                                                | 0                         | 0                         | 1                         | 0                         | 1                         | 1                         | 3 (10.3)                 |
| <b>Pulmonary edema</b>                                 | 0                         | 0                         | 0                         | 0                         | 0                         | 1                         | 1 (3.4)                  |
| Grade 3                                                | 0                         | 0                         | 0                         | 0                         | 0                         | 1                         | 1 (3.4)                  |
| <b>Respiratory failure</b>                             | 0                         | 0                         | 0                         | 0                         | 0                         | 1                         | 1 (3.4)                  |
| Grade 4                                                | 0                         | 0                         | 0                         | 0                         | 0                         | 1                         | 1 (3.4)                  |
| <b>Vascular disorders</b>                              |                           |                           |                           |                           |                           |                           |                          |
| <b>Hypertension</b>                                    | 1                         | 0                         | 0                         | 1                         | 1                         | 2                         | 5 (17.2)                 |

  

| MedDRA SOC<br>MedDRA PT        | Cohorts                   |                           |                           |                           |                           |                           | Total<br>N = 29<br>n (%) |
|--------------------------------|---------------------------|---------------------------|---------------------------|---------------------------|---------------------------|---------------------------|--------------------------|
|                                | 3.75<br>mg/m <sup>2</sup> | 4.68<br>mg/m <sup>2</sup> | 6.25<br>mg/m <sup>2</sup> | 7.81<br>mg/m <sup>2</sup> | 9.76<br>mg/m <sup>2</sup> | 12.2<br>mg/m <sup>2</sup> |                          |
| Grade 3                        | 1                         | 0                         | 0                         | 1                         | 1                         | 2                         | 5 (17.2)                 |
| <b>Hypotension</b>             | 1                         | 0                         | 0                         | 0                         | 0                         | 1                         | 2 (6.9)                  |
| Grade 3                        | 0                         | 0                         | 0                         | 0                         | 0                         | 1                         | 1 (3.4)                  |
| Grade 4                        | 1                         | 0                         | 0                         | 0                         | 0                         | 0                         | 1 (3.4)                  |
| <b>Orthostatic hypotension</b> | 0                         | 0                         | 0                         | 1                         | 0                         | 0                         | 1 (3.4)                  |
| Grade 3                        | 0                         | 0                         | 0                         | 1                         | 0                         | 0                         | 1 (3.4)                  |

Note: When the same event was reported twice for the same patient, it was only counted once, and the highest grade was captured.

**Table S5.** All Severe Adverse Events (SAEs) Occurring After Treatment with OXA in the OX1222 study.

| Patient No. | Cohort# | SAE Reported Term (CTCAE Grade)            | Relatedness with OXi4503 | SAE Outcome                 | Action Taken                       |
|-------------|---------|--------------------------------------------|--------------------------|-----------------------------|------------------------------------|
| 101-002     | 1       | Leukocytosis [Disease Progression] (5)     | Not related              | Not recovered/Fatal         | Permanently discontinued           |
| 103-002     | 1       | Tachycardia (3)                            | Not related              | Recovered, without sequelae | None                               |
| 103-002     | 1       | Pancytopenia (4)                           | Not related              | Recovered, without sequelae | None                               |
| 103-002     | 1       | Oral Mucositis (3)                         | Not related              | Recovered, without sequelae | None                               |
| 103-003     | 1       | Neutropenic Fever (3)                      | Not related              | Recovered, without sequelae | None                               |
| 103-003     | 1       | Hepatic Abscess (3)                        | Not related              | Recovered, with sequelae    | None                               |
| 106-001     | 1       | Periorbital cellulitis (3)                 | Not related              | Recovered, with sequelae    | None                               |
| 106-001     | 1       | Hypotension (4)                            | Not related              | Recovered, without sequelae | None                               |
| 106-004     | 1       | Neutropenic Fever (3)                      | Probably Not Related     | Recovered, without sequelae | None                               |
| 106-004     | 1       | Pyrexia (1)                                | Possibly related         | Recovered, without sequelae | None                               |
| 103-005     | 2       | Neutropenic fever (3)                      | Not related              | Recovered, without sequelae | None                               |
| 103-005     | 2       | Gram negative rod, bacterial infection (3) | Probably Not Related     | Recovered, without sequelae | None                               |
| 106-005     | 2       | Cellulitis of lower left leg [shin] (3)    | Not related              | Recovered, without sequelae | None                               |
| 106-005     | 2       | Febrile Neutropenia (3)                    | Not related              | Recovered, without sequelae | None                               |
| 106-006     | 2       | Neutropenic Fever (3)                      | Possibly related         | Recovered, without sequelae | None                               |
| 106-006     | 2       | Pyrexia (2)                                | Possibly related         | Not recovered               | None                               |
| 106-006     | 2       | Worsening of Acute Kidney Injury (4)       | Not related              | Recovered, without sequelae | Dose delayed for OXi4503 and ARA-C |
| 103-009     | 3       | Febrile Neutropenia (3)                    | Not related              | Recovered, without sequelae | None                               |
| 103-009     | 3       | Rectal Bleeding (3)                        | Probably Not Related     | Recovered, without sequelae | None                               |
| 101-005     | 3       | Bacteremia (3)                             | Probably Not Related     | Recovered, without sequelae | None                               |
| 107-002     | 3       | Aspergillus pneumonia (5)                  | Not related              | Not recovered/Fatal         | Permanently discontinued           |
| 103-010     | 4       | Neutropenic fever (3)                      | Related                  | Recovered, without sequelae | None                               |
| 103-010     | 4       | Perirectal Abscess (3)                     | Not related              | Recovered, without sequelae | None                               |
| 106-008     | 4       | Orthostatic Hypotension (3)                | Not related              | Recovered, without sequelae | None                               |
| 106-008     | 4       | Invasive Fungal Sinusitis (5)              | Not related              | Not recovered/Fatal         | None                               |
| 106-008     | 4       | Stroke (embolic) (4)                       | Probably Not Related     | Recovered, with sequelae    | Permanently discontinued           |

| Patient No. | Cohort# | SAE Reported Term (CTCAE Grade)                              | Relatedness with OXi4503 | SAE Outcome                 | Action Taken           |
|-------------|---------|--------------------------------------------------------------|--------------------------|-----------------------------|------------------------|
| 103-011     | 5       | Klebsiella pneumonia bacteremia (3)                          | Not related              | Recovered, without sequelae | Dose delayed for ARA-C |
| 106-009     | 5       | Febrile Neutropenia (3)                                      | Probably Not Related     | Recovered, without sequelae | None                   |
| 107-003     | 5       | Neutropenia (4)                                              | Unlikely Related         | Recovered, without sequelae | None                   |
| 107-008     | 5       | Sepsis (4)                                                   | Unrelated                | Recovered, without sequelae | None                   |
| 107-008     | 5       | Progressive disease (5)                                      | Unrelated                | Not recovered/Fatal         | None                   |
| 103-012     | 6       | Acute hypoxic respiratory failure (4) secondary to pneumonia | Possibly related         | Not recovered               | None                   |
| 106-011     | 6       | Hypotension (3)                                              | Possibly related         | Recovered                   | None                   |
| 106-011     | 6       | Lung Infection (multi-focal pneumonia) (3)                   | Not related              | Not recovered               | None                   |

**Table S6.** Incidence of SAEs occurring after treatment with OXA by MedDRA PT (any CTCAE Grade) regardless of any relationship with the study drug OXi4503.

| MedDRA SOC<br>MedDRA PT                     | Cohorts                   |                           |                           |                           |                           |                           | Total<br>N = 29<br>n (%) |
|---------------------------------------------|---------------------------|---------------------------|---------------------------|---------------------------|---------------------------|---------------------------|--------------------------|
|                                             | 3.75<br>mg/m <sup>2</sup> | 4.68<br>mg/m <sup>2</sup> | 6.25<br>mg/m <sup>2</sup> | 7.81<br>mg/m <sup>2</sup> | 9.76<br>mg/m <sup>2</sup> | 12.2<br>mg/m <sup>2</sup> |                          |
| <b>Blood and lymphatic system disorders</b> |                           |                           |                           |                           |                           |                           |                          |
| <b>Febrile neutropenia</b>                  | <b>2</b>                  | <b>3</b>                  | <b>1</b>                  | <b>1</b>                  | <b>1</b>                  | <b>0</b>                  | <b>8 (27.6)</b>          |
| Grade 3                                     | 2                         | 3                         | 1                         | 1                         | 1                         | 0                         | 8 (27.6)                 |
| <b>Leukocytosis</b>                         | <b>1</b>                  | <b>0</b>                  | <b>0</b>                  | <b>0</b>                  | <b>0</b>                  | <b>0</b>                  | <b>1 (3.4)</b>           |
| Grade 5                                     | 1                         | 0                         | 0                         | 0                         | 0                         | 0                         | 1 (3.4)                  |
| <b>Neutropenia</b>                          | <b>0</b>                  | <b>0</b>                  | <b>0</b>                  | <b>0</b>                  | <b>1</b>                  | <b>0</b>                  | <b>1 (3.4)</b>           |
| Grade 4                                     | 0                         | 0                         | 0                         | 0                         | 1                         | 0                         | 1 (3.4)                  |
| <b>Pancytopenia</b>                         | <b>1</b>                  | <b>0</b>                  | <b>0</b>                  | <b>0</b>                  | <b>0</b>                  | <b>0</b>                  | <b>1 (3.4)</b>           |
| Grade 4                                     | 1                         | 0                         | 0                         | 0                         | 0                         | 0                         | 1 (3.4)                  |
| <b>Cardiac disorders</b>                    |                           |                           |                           |                           |                           |                           |                          |
| <b>Tachycardia</b>                          | <b>1</b>                  | <b>0</b>                  | <b>0</b>                  | <b>0</b>                  | <b>0</b>                  | <b>0</b>                  | <b>1 (3.4)</b>           |
| Grade 3                                     | 1                         | 0                         | 0                         | 0                         | 0                         | 0                         | 1 (3.4)                  |
| <b>Gastrointestinal disorders</b>           |                           |                           |                           |                           |                           |                           |                          |
| <b>Rectal hemorrhage</b>                    | <b>0</b>                  | <b>0</b>                  | <b>1</b>                  | <b>0</b>                  | <b>0</b>                  | <b>0</b>                  | <b>1 (3.4)</b>           |
| Grade 3                                     | 0                         | 0                         | 1                         | 0                         | 0                         | 0                         | 1 (3.4)                  |
| <b>Stomatitis</b>                           | <b>1</b>                  | <b>0</b>                  | <b>0</b>                  | <b>0</b>                  | <b>0</b>                  | <b>0</b>                  | <b>1 (3.4)</b>           |
| Grade 3                                     | 1                         | 0                         | 0                         | 0                         | 0                         | 0                         | 1 (3.4)                  |
| General Disorders<br>Pyrexia (Grade ½)      | 1                         | 1                         | 0                         | 0                         | 0                         | 0                         | 2 (6.9)                  |
| <b>Infections and infestations</b>          |                           |                           |                           |                           |                           |                           |                          |
| <b>Bacteremia</b>                           | <b>0</b>                  | <b>0</b>                  | <b>1</b>                  | <b>0</b>                  | <b>0</b>                  | <b>0</b>                  | <b>1 (3.4)</b>           |
| Grade 3                                     | 0                         | 0                         | 1                         | 0                         | 0                         | 0                         | 1 (3.4)                  |
| <b>Bacterial infection</b>                  | <b>0</b>                  | <b>1</b>                  | <b>0</b>                  | <b>0</b>                  | <b>0</b>                  | <b>0</b>                  | <b>1 (3.4)</b>           |
| Grade 3                                     | 0                         | 1                         | 0                         | 0                         | 0                         | 0                         | 1 (3.4)                  |
| <b>Bronchopulmonary aspergillosis</b>       | <b>0</b>                  | <b>0</b>                  | <b>1</b>                  | <b>0</b>                  | <b>0</b>                  | <b>0</b>                  | <b>1 (3.4)</b>           |
| Grade 5                                     | 0                         | 0                         | 1                         | 0                         | 0                         | 0                         | 1 (3.4)                  |
| <b>Cellulitis</b>                           | <b>0</b>                  | <b>1</b>                  | <b>0</b>                  | <b>0</b>                  | <b>0</b>                  | <b>0</b>                  | <b>1 (3.4)</b>           |
| Grade 3                                     | 0                         | 1                         | 0                         | 0                         | 0                         | 0                         | 1 (3.4)                  |
| <b>Liver abscess</b>                        | <b>1</b>                  | <b>0</b>                  | <b>0</b>                  | <b>0</b>                  | <b>0</b>                  | <b>0</b>                  | <b>1 (3.4)</b>           |
| Grade 3                                     | 1                         | 0                         | 0                         | 0                         | 0                         | 0                         | 1 (3.4)                  |
| <b>Periorbital cellulitis</b>               | <b>1</b>                  | <b>0</b>                  | <b>0</b>                  | <b>0</b>                  | <b>0</b>                  | <b>0</b>                  | <b>1 (3.4)</b>           |
| Grade 3                                     | 1                         | 0                         | 0                         | 0                         | 0                         | 0                         | 1 (3.4)                  |
| <b>Perirectal abscess</b>                   | <b>0</b>                  | <b>0</b>                  | <b>0</b>                  | <b>1</b>                  | <b>0</b>                  | <b>0</b>                  | <b>1 (3.4)</b>           |
| Grade 3                                     | 0                         | 0                         | 0                         | 1                         | 0                         | 0                         | 1 (3.4)                  |
| <b>Pneumonia</b>                            | <b>0</b>                  | <b>0</b>                  | <b>0</b>                  | <b>0</b>                  | <b>0</b>                  | <b>1</b>                  | <b>1 (3.4)</b>           |
| Grade 3                                     | 0                         | 0                         | 0                         | 0                         | 0                         | 1                         | 1 (3.4)                  |
| <b>Pneumonia klebsiella bacteremia</b>      | <b>0</b>                  | <b>0</b>                  | <b>0</b>                  | <b>0</b>                  | <b>1</b>                  | <b>0</b>                  | <b>1 (3.4)</b>           |
| Grade 3                                     | 0                         | 0                         | 0                         | 0                         | 1                         | 0                         | 1 (3.4)                  |
| <b>Sepsis</b>                               | <b>0</b>                  | <b>0</b>                  | <b>0</b>                  | <b>0</b>                  | <b>1</b>                  | <b>0</b>                  | <b>1 (3.4)</b>           |

| MedDRA SOC<br>MedDRA PT                                | Cohorts                   |                           |                           |                           |                           |                           | Total<br>N = 29<br>n (%) |
|--------------------------------------------------------|---------------------------|---------------------------|---------------------------|---------------------------|---------------------------|---------------------------|--------------------------|
|                                                        | 3.75<br>mg/m <sup>2</sup> | 4.68<br>mg/m <sup>2</sup> | 6.25<br>mg/m <sup>2</sup> | 7.81<br>mg/m <sup>2</sup> | 9.76<br>mg/m <sup>2</sup> | 12.2<br>mg/m <sup>2</sup> |                          |
| Grade 4                                                | 0                         | 0                         | 0                         | 0                         | 1                         | 0                         | 1 (3.4)                  |
| <b>Sinusitis fungal</b>                                | <b>0</b>                  | <b>0</b>                  | <b>0</b>                  | <b>1</b>                  | <b>0</b>                  | <b>0</b>                  | <b>1 (3.4)</b>           |
| Grade 5                                                | 0                         | 0                         | 0                         | 1                         | 0                         | 0                         | 1 (3.4)                  |
| <b>Nervous system disorders</b>                        |                           |                           |                           |                           |                           |                           |                          |
| <b>Embolic stroke</b>                                  | <b>0</b>                  | <b>0</b>                  | <b>0</b>                  | <b>1</b>                  | <b>0</b>                  | <b>0</b>                  | <b>1 (3.4)</b>           |
| Grade 4                                                | 0                         | 0                         | 0                         | 1                         | 0                         | 0                         | 1 (3.4)                  |
| <b>Renal and urinary disorders</b>                     |                           |                           |                           |                           |                           |                           |                          |
| <b>Acute kidney injury</b>                             | <b>0</b>                  | <b>1</b>                  | <b>0</b>                  | <b>0</b>                  | <b>0</b>                  | <b>0</b>                  | <b>1(3.4)</b>            |
| Grade 4                                                | 0                         | 1                         | 0                         | 0                         | 0                         | 0                         | 1 (3.4)                  |
| <b>Respiratory, thoracic and mediastinal disorders</b> |                           |                           |                           |                           |                           |                           |                          |
| <b>Respiratory failure</b>                             | <b>0</b>                  | <b>0</b>                  | <b>0</b>                  | <b>0</b>                  | <b>0</b>                  | <b>1</b>                  | <b>1 (3.4)</b>           |
| Grade 4                                                | 0                         | 0                         | 0                         | 0                         | 0                         | 1                         | 1 (3.4)                  |
| <b>Vascular disorders</b>                              |                           |                           |                           |                           |                           |                           |                          |
| <b>Hypotension</b>                                     | <b>1</b>                  | <b>0</b>                  | <b>0</b>                  | <b>0</b>                  | <b>0</b>                  | <b>1</b>                  | <b>2 (6.9)</b>           |
| Grade 3                                                | 0                         | 0                         | 0                         | 0                         | 0                         | 1                         | 1 (3.4)                  |
| Grade 4                                                | 1                         | 0                         | 0                         | 0                         | 0                         | 0                         | 1 (3.4)                  |
| <b>Orthostatic hypotension</b>                         | <b>0</b>                  | <b>0</b>                  | <b>0</b>                  | <b>1</b>                  | <b>0</b>                  | <b>0</b>                  | <b>1 (3.4)</b>           |
| Grade 3                                                | 0                         | 0                         | 0                         | 1                         | 0                         | 0                         | 1 (3.4)                  |

Note: When the same event was reported twice for the same patient, it was only counted once, and the highest grade was captured.

**Table S7.** Incidence of laboratory abnormalities\* CTCAE Grade 3-4 by MedDRA PT regardless of any relationship with the study drug OXi4503.

| MedDRA SOC<br>MedDRA PT              | CTCAE<br>Grade | Cohorts                   |                           |                           |                           |                           |                           | Total<br>N = 29<br>n (%) |
|--------------------------------------|----------------|---------------------------|---------------------------|---------------------------|---------------------------|---------------------------|---------------------------|--------------------------|
|                                      |                | 3.75<br>mg/m <sup>2</sup> | 4.68<br>mg/m <sup>2</sup> | 6.25<br>mg/m <sup>2</sup> | 7.81<br>mg/m <sup>2</sup> | 9.76<br>mg/m <sup>2</sup> | 12.2<br>mg/m <sup>2</sup> |                          |
| <b>Investigations</b>                |                |                           |                           |                           |                           |                           |                           |                          |
| Alanine aminotransferase increased   | Grade 3        | 0                         | 0                         | 0                         | 0                         | 1                         | 1                         | 2 (6.9)                  |
| Aspartate aminotransferase increased | Grade 3        | 1                         | 0                         | 0                         | 0                         | 0                         | 1                         | 2 (6.9)                  |
| Blood alkaline phosphatase increased | Grade 3        | 0                         | 0                         | 0                         | 0                         | 0                         | 1                         | 1 (3.4)                  |
| Blood bilirubin increased            | Grade 3        | 0                         | 0                         | 0                         | 0                         | 0                         | 1                         | 1 (3.4)                  |
| Blood fibrinogen decreased           | Grade 3        | 1                         | 0                         | 0                         | 0                         | 0                         | 0                         | 1 (3.4)                  |
| Lipase increased                     | Grade 3        | 1                         | 0                         | 0                         | 0                         | 0                         | 0                         | 1 (3.4)                  |
| Neutrophil count decreased           | Grade 3        | 1                         | 0                         | 0                         | 0                         | 2                         | 0                         | 2 (6.9)                  |
|                                      | Grade 4        | 1                         | 0                         | 0                         | 1                         | 0                         | 0                         | 2 (6.9)                  |
| Platelet count decreased             | Grade 3        | 0                         | 0                         | 0                         | 0                         | 1                         | 0                         | 1 (3.4)                  |
|                                      | Grade 4        | 2                         | 2                         | 0                         | 1                         | 0                         | 1                         | 6 (20.7)                 |
| Prothrombin time prolonged           | Grade 3        | 1                         | 0                         | 0                         | 0                         | 0                         | 0                         | 1(3.4)                   |
| White blood cell count decreased     | Grade 4        | 0                         | 0                         | 0                         | 1                         | 1                         | 0                         | 2 (6.9)                  |
| White blood cell count increased     | Grade 3        | 1                         | 0                         | 0                         | 0                         | 0                         | 0                         | 1 (3.4)                  |

Note: When the same event was reported twice for the same patient, it was only counted once, and the highest grade was captured. \*This table includes lab abnormalities reported as adverse events.

Table S8. Incidence of OXi4503-related AEs by MedDRA PT (any CTCAE Grade).

| MedDRA SOC<br>MedDRA PT                                     | Cohorts                   |                           |                           |                           |                           |                           | Total<br>N = 29<br>n (%) |
|-------------------------------------------------------------|---------------------------|---------------------------|---------------------------|---------------------------|---------------------------|---------------------------|--------------------------|
|                                                             | 3.75<br>mg/m <sup>2</sup> | 4.68<br>mg/m <sup>2</sup> | 6.25<br>mg/m <sup>2</sup> | 7.81<br>mg/m <sup>2</sup> | 9.76<br>mg/m <sup>2</sup> | 12.2<br>mg/m <sup>2</sup> |                          |
| <b>Blood and lymphatic system disorders</b>                 |                           |                           |                           |                           |                           |                           |                          |
| <b>Anemia</b>                                               | 1                         | 1                         | 0                         | 1                         | 1                         | 0                         | 4 (13.8)                 |
| Definitely related                                          | 1                         | 0                         | 0                         | 0                         | 0                         | 0                         | 1 (3.4)                  |
| Possibly related                                            | 0                         | 1                         | 0                         | 1                         | 1                         | 0                         | 3 (10.3)                 |
| Probably related                                            | 1                         | 0                         | 0                         | 0                         | 0                         | 0                         | 1 (3.4)                  |
| <b>Disseminated intravascular coagulation</b>               | 0                         | 0                         | 0                         | 0                         | 0                         | 1                         | 1 (3.4)                  |
| Definitely related                                          | 0                         | 0                         | 0                         | 0                         | 0                         | 1                         | 1 (3.4)                  |
| <b>Febrile neutropenia</b>                                  | 0                         | 1                         | 2                         | 3                         | 1                         | 1                         | 8 (27.6)                 |
| Definitely related                                          | 0                         | 0                         | 0                         | 1                         | 0                         | 0                         | 1 (3.4)                  |
| Possibly related                                            | 0                         | 1                         | 0                         | 1                         | 1                         | 1                         | 4 (13.8)                 |
| Probably related                                            | 0                         | 0                         | 2                         | 1                         | 0                         | 0                         | 3 (10.3)                 |
| <b>Neutropenia</b>                                          | 0                         | 1                         | 0                         | 0                         | 0                         | 0                         | 1 (3.4)                  |
| Possibly related                                            | 0                         | 1                         | 0                         | 0                         | 0                         | 0                         | 1 (3.4)                  |
| <b>Pancytopenia</b>                                         | 0                         | 0                         | 1                         | 0                         | 0                         | 0                         | 1 (3.4)                  |
| Possibly related                                            | 0                         | 0                         | 1                         | 0                         | 0                         | 0                         | 1 (3.4)                  |
| <b>Thrombocytopenia</b>                                     | 0                         | 1                         | 0                         | 0                         | 0                         | 0                         | 1 (3.4)                  |
| Possibly related                                            | 0                         | 1                         | 0                         | 0                         | 0                         | 0                         | 1 (3.4)                  |
| <b>Gastrointestinal disorders</b>                           |                           |                           |                           |                           |                           |                           |                          |
| <b>Constipation</b>                                         | 1                         | 0                         | 0                         | 0                         | 0                         | 0                         | 1 (3.4)                  |
| Possibly related                                            | 1                         | 0                         | 0                         | 0                         | 0                         | 0                         | 1 (3.4)                  |
| <b>Diarrhea</b>                                             | 0                         | 0                         | 1                         | 0                         | 0                         | 0                         | 1 (3.4)                  |
| Possibly related                                            | 0                         | 0                         | 1                         | 0                         | 0                         | 0                         | 1 (3.4)                  |
| <b>Nausea</b>                                               | 1                         | 0                         | 1                         | 0                         | 2                         | 0                         | 4 (13.8)                 |
| Possibly related                                            | 1                         | 0                         | 0                         | 0                         | 2                         | 0                         | 3 (10.3)                 |
| Probably related                                            | 0                         | 0                         | 1                         | 0                         | 0                         | 0                         | 1 (3.4)                  |
| <b>Proctalgia</b>                                           | 0                         | 0                         | 1                         | 0                         | 0                         | 0                         | 1 (3.4)                  |
| Probably related                                            | 0                         | 0                         | 1                         | 0                         | 0                         | 0                         | 1 (3.4)                  |
| <b>Vomiting</b>                                             | 1                         | 0                         | 0                         | 0                         | 1                         | 0                         | 2 (6.9)                  |
| Possibly related                                            | 0                         | 0                         | 0                         | 0                         | 1                         | 0                         | 1 (3.4)                  |
| Probably related                                            | 0                         | 0                         | 1                         | 0                         | 0                         | 0                         | 1 (3.4)                  |
| <b>General disorders and administration site conditions</b> |                           |                           |                           |                           |                           |                           |                          |
| <b>Chills</b>                                               | 0                         | 0                         | 3                         | 0                         | 0                         | 0                         | 3 (10.3)                 |
| Probably related                                            | 0                         | 0                         | 1                         | 0                         | 0                         | 0                         | 1 (3.4)                  |
| Possibly related                                            | 0                         | 0                         | 2                         | 0                         | 0                         | 0                         | 2 (6.9)                  |
| <b>Edema</b>                                                | 1                         | 0                         | 0                         | 0                         | 0                         | 0                         | 1 (3.4)                  |
| Possibly related                                            | 1                         | 0                         | 0                         | 0                         | 0                         | 0                         | 1 (3.4)                  |
| <b>Pain</b>                                                 | 0                         | 0                         | 0                         | 1                         | 0                         | 0                         | 1 (3.4)                  |
| Possibly related                                            | 0                         | 0                         | 0                         | 1                         | 0                         | 0                         | 1 (3.4)                  |
| <b>Pyrexia</b>                                              | 0                         | 0                         | 2                         | 0                         | 0                         | 0                         | 2 (6.9)                  |
| Probably related                                            | 0                         | 0                         | 2                         | 0                         | 0                         | 0                         | 2 (6.9)                  |
| <b>Infections and infestations</b>                          |                           |                           |                           |                           |                           |                           |                          |

| MedDRA SOC<br>MedDRA PT                                | Cohorts                   |                           |                           |                           |                           |                           | Total<br>N = 29<br>n (%) |
|--------------------------------------------------------|---------------------------|---------------------------|---------------------------|---------------------------|---------------------------|---------------------------|--------------------------|
|                                                        | 3.75<br>mg/m <sup>2</sup> | 4.68<br>mg/m <sup>2</sup> | 6.25<br>mg/m <sup>2</sup> | 7.81<br>mg/m <sup>2</sup> | 9.76<br>mg/m <sup>2</sup> | 12.2<br>mg/m <sup>2</sup> |                          |
| <b>Bacteremia</b>                                      | 0                         | 0                         | 1                         | 0                         | 0                         | 0                         | 1 (3.4)                  |
| Probably related                                       | 0                         | 0                         | 0                         | 1                         | 0                         | 0                         | 1 (3.4)                  |
| <b>Pneumonia</b>                                       | 0                         | 0                         | 0                         | 0                         | 0                         | 1                         | 1 (3.4)                  |
| Possibly related                                       | 0                         | 0                         | 0                         | 0                         | 0                         | 1                         | 1 (3.4)                  |
| <b>Investigations</b>                                  |                           |                           |                           |                           |                           |                           |                          |
| <b>Activated partial thromboplastin time prolonged</b> | 1                         | 0                         | 0                         | 0                         | 0                         | 0                         | 1 (3.4)                  |
| Probably related                                       | 1                         | 0                         | 0                         | 0                         | 0                         | 0                         | 1 (3.4)                  |
| <b>Alanine aminotransferase increased</b>              | 1                         | 0                         | 0                         | 0                         | 0                         | 1                         | 2 (6.9)                  |
| Definitely related                                     | 1                         | 0                         | 0                         | 0                         | 0                         | 0                         | 1 (3.4)                  |
| Possibly related                                       | 0                         | 0                         | 0                         | 0                         | 0                         | 1                         | 1 (3.4)                  |
| <b>Aspartate aminotransferase increased</b>            | 1                         | 0                         | 0                         | 0                         | 0                         | 1                         | 2 (6.9)                  |
| Definitely related                                     | 1                         | 0                         | 0                         | 0                         | 0                         | 0                         | 1 (3.4)                  |
| Possibly related                                       | 0                         | 0                         | 0                         | 0                         | 0                         | 1                         | 1 (3.4)                  |
| <b>Blood bilirubin increased</b>                       | 0                         | 0                         | 0                         | 1                         | 0                         | 1                         | 2 (6.9)                  |
| Possibly related                                       | 0                         | 0                         | 0                         | 1                         | 0                         | 1                         | 2 (6.9)                  |
| <b>Blood fibrinogen decreased</b>                      | 2                         | 0                         | 0                         | 1                         | 1                         | 1                         | 5 (17.2)                 |
| Possibly related                                       | 0                         | 0                         | 0                         | 1                         | 0                         | 0                         | 1 (3.4)                  |
| Definitely related                                     | 2                         | 0                         | 0                         | 0                         | 1                         | 1                         | 4 (13.8)                 |
| <b>Fibrin D-dimer increased</b>                        | 0                         | 0                         | 0                         | 0                         | 1                         | 0                         | 1 (3.4)                  |
| Probably related                                       | 0                         | 0                         | 0                         | 0                         | 1                         | 0                         | 1 (3.4)                  |
| <b>International normalized ratio increased</b>        | 0                         | 0                         | 0                         | 1                         | 0                         | 0                         | 1 (3.4)                  |
| Possibly related                                       | 0                         | 0                         | 0                         | 1                         | 0                         | 0                         | 1 (3.4)                  |
| <b>Neutrophil count decreased</b>                      | 2                         | 0                         | 0                         | 1                         | 1                         | 0                         | 4 (13.8)                 |
| Possibly related                                       | 1                         | 0                         | 0                         | 0                         | 1                         | 0                         | 2 (6.9)                  |
| Possibly related                                       | 1                         | 0                         | 0                         | 1                         | 0                         | 0                         | 2 (6.9)                  |
| <b>Platelet count decreased</b>                        | 2                         | 1                         | 0                         | 1                         | 1                         | 0                         | 5 (17.2)                 |
| Possibly related                                       | 0                         | 1                         | 0                         | 1                         | 1                         | 0                         | 3 (10.3)                 |
| Probably related                                       | 2                         | 0                         | 0                         | 0                         | 0                         | 0                         | 2 (6.9)                  |
| <b>Prothrombin time prolonged</b>                      | 1                         | 0                         | 0                         | 0                         | 0                         | 0                         | 1 (3.4)                  |
| Probably related                                       | 1                         | 0                         | 0                         | 0                         | 0                         | 0                         | 1 (3.4)                  |
| <b>White blood cell count decreased</b>                | 0                         | 0                         | 0                         | 1                         | 1                         | 0                         | 2 (6.9)                  |
| Possibly related                                       | 0                         | 0                         | 0                         | 1                         | 1                         | 0                         | 2 (6.9)                  |
| <b>Metabolism and nutrition disorders</b>              |                           |                           |                           |                           |                           |                           |                          |
| <b>Hyperammonemia</b>                                  | 0                         | 0                         | 0                         | 0                         | 0                         | 1                         | 1 (3.4)                  |
| Possibly related                                       | 0                         | 0                         | 0                         | 0                         | 0                         | 1                         | 1 (3.4)                  |
| <b>Hyperkalemia</b>                                    | 0                         | 1                         | 0                         | 0                         | 0                         | 0                         | 1 (3.4)                  |
| Possibly related                                       | 0                         | 1                         | 0                         | 0                         | 0                         | 0                         | 1 (3.4)                  |
| <b>Hyperuricemia</b>                                   | 0                         | 0                         | 0                         | 1                         | 0                         | 0                         | 1 (3.4)                  |
| Possibly related                                       | 0                         | 0                         | 0                         | 1                         | 0                         | 0                         | 1 (3.4)                  |
| <b>Hypocalcemia</b>                                    | 0                         | 1                         | 0                         | 0                         | 0                         | 0                         | 1 (3.4)                  |
| Possibly related                                       | 0                         | 1                         | 0                         | 0                         | 0                         | 0                         | 1 (3.4)                  |



| MedDRA SOC<br>MedDRA PT                                | Cohorts                   |                           |                           |                           |                           |                           | Total<br>N = 29<br>n (%) |
|--------------------------------------------------------|---------------------------|---------------------------|---------------------------|---------------------------|---------------------------|---------------------------|--------------------------|
|                                                        | 3.75<br>mg/m <sup>2</sup> | 4.68<br>mg/m <sup>2</sup> | 6.25<br>mg/m <sup>2</sup> | 7.81<br>mg/m <sup>2</sup> | 9.76<br>mg/m <sup>2</sup> | 12.2<br>mg/m <sup>2</sup> |                          |
| <b>Hypokalemia</b>                                     | 1                         | 0                         | 0                         | 0                         | 0                         | 0                         | 1 (3.4)                  |
| Possibly related                                       | 1                         | 0                         | 0                         | 0                         | 0                         | 0                         | 1 (3.4)                  |
| <b>Hypomagnesemia</b>                                  | 0                         | 0                         | 0                         | 0                         | 0                         | 1                         | 1 (3.4)                  |
| Possibly related                                       | 0                         | 0                         | 0                         | 0                         | 0                         | 1                         | 1 (3.4)                  |
| <b>Musculoskeletal and connective tissue disorders</b> |                           |                           |                           |                           |                           |                           |                          |
| <b>Back pain</b>                                       | 0                         | 0                         | 0                         | 1                         | 0                         | 0                         | 1 (3.4)                  |
| Possibly related                                       | 0                         | 0                         | 0                         | 1                         | 0                         | 0                         | 1 (3.4)                  |
| <b>Bone pain</b>                                       | 0                         | 0                         | 1                         | 1                         | 1                         | 1                         | 4 (13.8)                 |
| Definitely related                                     | 0                         | 0                         | 0                         | 0                         | 1                         | 1                         | 2 (6.9)                  |
| Possibly related                                       | 0                         | 0                         | 1                         | 1                         | 0                         | 0                         | 2 (6.9)                  |
| <b>Pain in jaw</b>                                     | 0                         | 0                         | 0                         | 0                         | 1                         | 0                         | 1 (3.4)                  |
| Definitely related                                     | 0                         | 0                         | 0                         | 0                         | 1                         | 0                         | 1 (3.4)                  |
| <b>Nervous system disorders</b>                        |                           |                           |                           |                           |                           |                           |                          |
| <b>Headache</b>                                        | 0                         | 0                         | 0                         | 0                         | 1                         | 1                         | 2 (6.9)                  |
| Definitely related                                     | 0                         | 0                         | 0                         | 0                         | 0                         | 1                         | 1 (3.4)                  |
| Possibly related                                       | 0                         | 0                         | 0                         | 0                         | 1                         | 0                         | 1 (3.4)                  |
| <b>Psychiatric disorders</b>                           |                           |                           |                           |                           |                           |                           |                          |
| <b>Delirium</b>                                        | 0                         | 0                         | 0                         | 0                         | 0                         | 1                         | 1 (3.4)                  |
| Possibly related                                       | 0                         | 0                         | 0                         | 0                         | 0                         | 1                         | 1 (3.4)                  |
| <b>Renal and urinary disorders</b>                     |                           |                           |                           |                           |                           |                           |                          |
| <b>Urinary incontinence</b>                            | 0                         | 0                         | 0                         | 0                         | 0                         | 1                         | 1 (3.4)                  |
| Definitely related                                     | 0                         | 0                         | 0                         | 0                         | 0                         | 1                         | 1 (3.4)                  |
| <b>Respiratory, thoracic and mediastinal disorders</b> |                           |                           |                           |                           |                           |                           |                          |
| <b>Respiratory failure</b>                             | 0                         | 0                         | 0                         | 0                         | 0                         | 1                         | 1 (3.4)                  |
| Possibly related                                       | 0                         | 0                         | 0                         | 0                         | 0                         | 1                         | 1 (3.4)                  |
| <b>Skin and subcutaneous tissue disorders</b>          |                           |                           |                           |                           |                           |                           |                          |
| <b>Petechiae</b>                                       | 0                         | 0                         | 1                         | 0                         | 0                         | 0                         | 1 (3.4)                  |
| Possibly related                                       | 0                         | 0                         | 1                         | 0                         | 0                         | 0                         | 1 (3.4)                  |
| <b>Vascular disorders</b>                              |                           |                           |                           |                           |                           |                           |                          |
| <b>Hypertension</b>                                    | 1                         | 0                         | 1                         | 1                         | 2                         | 2                         | 7 (24.1)                 |
| Possibly related                                       | 1                         | 0                         | 1                         | 0                         | 0                         | 1                         | 2 (6.9)                  |
| Probably related                                       | 0                         | 0                         | 0                         | 1                         | 2                         | 0                         | 3 (10.3)                 |
| Definitely related                                     | 0                         | 0                         | 0                         | 0                         | 1                         | 1                         | 2 (6.9)                  |
| <b>Hypotension</b>                                     | 0                         | 0                         | 0                         | 0                         | 0                         | 1                         | 1 (3.4)                  |
| Possibly related                                       | 0                         | 0                         | 0                         | 0                         | 0                         | 1                         | 1 (3.4)                  |

Note: When the same event was reported twice for the same patient, it was only counted once, and the highest grade was captured.

**Table S9.** OXi4503-related Grade 3/4 AEs and Survival Outcome in Study OX1222 patients treated with OXA. There were no incidences of drug-related Grade 5 adverse events.

| Patient ID | Cohort# | Reported Term (Grade)                                                                                                                                        | Related SAE (Yes/No)        | EOS Reason       | Other Therapy post EOS | Time to Death or Last FU after CID1 (Days) | Survival Status at Last FU | Cause of Death                        |
|------------|---------|--------------------------------------------------------------------------------------------------------------------------------------------------------------|-----------------------------|------------------|------------------------|--------------------------------------------|----------------------------|---------------------------------------|
| 101-002    | 1       | Fibrinogen decrease (3)<br>Hypokalemia (3)<br>Neutrophil count decrease (3)                                                                                  | No<br>No<br>No              | LOE              | HU                     | 30                                         | D                          | PD                                    |
| 106-004    | 1       | Hypertension (3)                                                                                                                                             | No                          | CRi→DLI          | DLI                    | 535                                        | D                          | PD                                    |
| 103-004    | 1       | Platelet count decrease (4)<br>Neutrophil count decrease (4)                                                                                                 | No<br>No                    | LOE              | Not reported           | 106                                        | D                          | PD                                    |
| 103-002    | 1       | PT increased (3)<br>AST increase (3)<br>Anemia(4).<br>Platelet count decreased (4)                                                                           | No<br>No<br>No<br>No        | LOE              | Not reported           | 77                                         | D                          | PD                                    |
| 103-003    | 1       | None                                                                                                                                                         | No                          | PD               | Not reported           | 87                                         | D                          | PD                                    |
| 106-001    | 1       | None                                                                                                                                                         | No                          | PD               | Not reported           | 172                                        | D                          | PD                                    |
| 106-003    | 1       | None                                                                                                                                                         | No                          | NE               | Not reported           | 40                                         | D                          | NR/LFU                                |
| 106-005    | 2       | None                                                                                                                                                         | No                          | PD               | 7+3:HU                 | 285                                        | D                          | PD                                    |
| 106-006    | 2       | Febrile neutropenia (3 - SAE)<br>Worsened anemia (3)<br>Platelet decrease (4).<br>Neutropenia (4)                                                            | Yes<br>No<br>No<br>No       | CRi              | Mylotarg, 5-AC         | 521                                        | D                          | PD                                    |
| 103-005    | 2       | Platelet count decrease (4)                                                                                                                                  | No                          | LOE              | CAFFdA, Allo-PBSCT     | 212                                        | D                          | PD                                    |
| 103-008    | 2       | None                                                                                                                                                         | No                          | LOE              | None                   | 48                                         | D                          | PD                                    |
| 101-005    | 3       | Febrile neutropenia (3)                                                                                                                                      | No                          | LOE              | Jakafi                 | 119                                        | D                          | PD                                    |
| 103-009    | 3       | None                                                                                                                                                         | No                          | CR→SCT           | SCT, 5AZA              | 434                                        | D                          | PD                                    |
| 107-001    | 3       | Febrile neutropenia (3)                                                                                                                                      | Yes                         | LOE              | IP                     | 191                                        | D                          | NR                                    |
| 107-002    | 3       | None                                                                                                                                                         | No                          | LOE              | NA                     | 59                                         | D                          | Aspergillus pneumonia (Unrelated)     |
| 106-008    | 4       | Febrile neutropenia(3).<br>WBC decrease (4).<br>Hypertension (3)                                                                                             | No<br>No<br>No              | Unrelated SAE    | NA                     | 61                                         | D                          | Invasive fungal sinusitis (Unrelated) |
| 103-010    | 4       | Febrile neutropenia (3 - SAE)<br>Platelet count decrease (4).<br>Anemia worsening (3)                                                                        | Yes<br>No<br>No             | LOE              | 5-AC, Nexavar          | 135                                        | D                          | PD                                    |
| 101-006    | 4       | Febrile neutropenia (3)<br>Bacteremia (3)<br>Neutrophil count decreased (4)                                                                                  | No<br>No<br>No              | LOE              | Velcade, HU            | 113                                        | D                          | PD                                    |
| 106-009    | 5       | Neutrophil count decrease (3).<br>Platelet count decrease(3).<br>WBC decrease (4).<br>Hypertension (3)                                                       | No<br>No<br>No<br>No        | LOE              | 5AZA                   | 232                                        | D                          | NR/HOS                                |
| 107-003    | 5       | Febrile neutropenia (3)                                                                                                                                      | No                          | LOE              | Allo PBSCT             | 720                                        | A                          | NA                                    |
| 103-011    | 5       | Worsening anemia (3)                                                                                                                                         | No                          | LOE              | LDAC                   | 298                                        | D                          | PD                                    |
| 101-007    | 5       | None                                                                                                                                                         | No                          | LOE              | NR                     | 393                                        | D                          | PD                                    |
| 107-004    | 5       | None                                                                                                                                                         | No                          | LOE              | NA                     | 114                                        | D                          | PD                                    |
| 107-007    | 5       | None                                                                                                                                                         | No                          | LOE              | NA                     | 69                                         | D                          | PD                                    |
| 107-008    | 5       | None                                                                                                                                                         | No                          | LOE              | NA                     | 66                                         | D                          | PD                                    |
| 103-012    | 6       | Hypertension (3).<br>AST increase (3).<br>Febrile neutropenia (3).<br>Pneumonia (3).<br>Acute hypoxic respiratory failure resulting from pneumonia (4 – SAE) | No<br>No<br>No<br>No<br>Yes | PD               | NA                     | 34                                         | D                          | PD and SAE                            |
| 103-013    | 6       | None                                                                                                                                                         | No                          | LOE              | -                      | 77                                         | D                          | PD                                    |
| 106-010    | 6       | Hypertension (3)                                                                                                                                             | No                          | LOE and ARA-C NT | NR/LFU                 | 127                                        | D                          | NR/LFU                                |
| 106-011    | 6       | Hypotension (3)<br>Blood bilirubin increased (3)                                                                                                             | Yes<br>No                   | LOE              | NR/LFU                 | 58                                         | D                          | PD                                    |

C1D1: Cycle 1 Day 1; FU: Follow-up; AML: acute myelogenous leukemia; MDS: Myelodysplastic Syndromes; PD: Progressive disease; CR i: Complete response with incomplete hematologic recovery; SD/RES: Stable disease/Refractory; NE: Not evaluable; CR: Complete response; A: Alive; D: Dead; EOS: End of Study; NA: Not available; LOE: Loss of efficacy; SAE: serious adverse event; HU: hydroxyurea; DLI: donor leukocyte infusion; 5-AC: 5-Azacytidine; PBSCT: Peripheral blood stem cell transplantation; SCT: stem cell transplant; 5AZA: deoxyazacytidine . NT: neurotoxicity.

**Table S10.** All study drug-related Grade 3–4 adverse events\* reported in Study OX1222. There were no incidences of drug-related Grade 5 adverse events.

| Patient No. | Cohort# | AE Reported Term (CTCAE Grade)           | Relatedness with OXi4503 | Outcome                     | Action Taken with OXi4503 |
|-------------|---------|------------------------------------------|--------------------------|-----------------------------|---------------------------|
| 101-002     | 1       | Hypokalemia (3)                          | Possibly related         | Recovered, without sequelae | None                      |
|             |         | Blood fibrinogen decreased (3)           | Definitely related       | Recovered, without sequelae | None                      |
|             |         | Neutrophil count decreased (3)           | Possibly related         | Recovered, without sequelae | None                      |
|             |         | Prothrombin time prolonged (3)           | Probably related         | Recovered, without sequelae | None                      |
|             |         | Anemia (3)                               | Definitely related       | Recovered, without sequelae | None                      |
| 103-002     | 1       | Anemia (4)                               | Probably related         | Recovered, without sequelae | None                      |
|             |         | Aspartate aminotransferase increased (3) | Definitely related       | Recovered, without sequelae | None                      |
|             |         | Platelet count decreased (4)             | Probably related         | Recovered, without sequelae | None                      |
| 103-004     | 1       | Platelet count decreased (4)             | Probably related         | Recovered, without sequelae | None                      |
|             |         | Neutrophil count decreased (4)           | Possibly related         | Recovered, without sequelae | None                      |
| 106-004     | 1       | Hypertension (3)                         | Possibly related         | Recovered, without sequelae | None                      |
|             |         | Febrile neutropenia (3)                  | Possibly related         | Recovered, without sequelae | None                      |
|             |         | Anemia, worsening (3)                    | Possibly related         | Recovered, without sequelae | None                      |
| 106-006     | 2       | Thrombocytopenia (4)                     | Possibly related         | Recovered, without sequelae | None                      |
|             |         | Neutropenia (3)                          | Possibly related         | Recovered, without sequelae | None                      |
|             |         | Neutropenia (4)                          | Possibly related         | Recovered, without sequelae | None                      |
| 103-005     | 2       | Platelet count decreased (4)             | Possibly related         | Recovered, without sequelae | None                      |
| 101-005     | 3       | Febrile neutropenia (3)                  | Probably related         | Recovered, without sequelae | None                      |
| 107-001     | 3       | Febrile neutropenia (3)                  | Probably related         | Recovered, without sequelae | None                      |
|             |         | Febrile neutropenia (3)                  | Definitely related       | Recovered, without sequelae | None                      |
| 103-010     | 4       | Anemia, worsening (3)                    | Possibly related         | Recovering                  | None                      |
|             |         | Platelet count decreased (4)             | Possibly related         | Recovering                  | None                      |

| Patient No. | Cohort# | AE Reported Term (CTCAE Grade)           | Relatedness with OXi4503 | Outcome                     | Action Taken with OXi4503 |
|-------------|---------|------------------------------------------|--------------------------|-----------------------------|---------------------------|
| 106-008     | 4       | Febrile neutropenia (3)                  | Possibly related         | Recovered, without sequelae | None                      |
|             |         | White blood cell count decreased (4)     | Possibly related         | Not recovered               | None                      |
|             |         | White blood cell count decreased (3)     | Possibly related         | Not recovered               | None                      |
|             |         | Hypertension (3)                         | Probably related         | Recovered, without sequelae | None                      |
| 101-006     | 4       | Febrile neutropenia (3)                  | Probably related         | Recovered, without sequelae | None                      |
|             |         | Bacteremia (3)                           | Probably related         | Recovered, without sequelae | None                      |
|             |         | Neutrophil count decreased (3)           | Probably related         | Recovered, without sequelae | None                      |
|             |         | Neutrophil count decreased (4)           | Possibly related         | Recovered, without sequelae | None                      |
| 103-011     | 5       | Anemia, worsening (3)                    | Possibly related         | Recovered, without sequelae | None                      |
|             |         | Neutrophil count decreased (3)           | Possibly related         | Not recovered               | None                      |
| 106-009     | 5       | Platelet count decreased (3)             | Possibly related         | Not recovered               | None                      |
|             |         | White blood cell count decreased (4)     | Possibly related         | Not recovered               | None                      |
| 107-003     | 5       | Hypertension (3)                         | Definitely related       | Recovered, without sequelae | None                      |
|             |         | Febrile neutropenia (3)                  | Possibly related         | Recovered, without sequelae | None                      |
|             |         | Hypertension (3)                         | Definitely related       | Recovered, without sequelae | None                      |
| 103-012     | 6       | Aspartate aminotransferase increased (3) | Possibly related         | Recovered, without sequelae | None                      |
|             |         | Febrile neutropenia (3)                  | Possibly related         | Not recovered               | None                      |
|             |         | Pneumonia (3)                            | Possibly related         | Not recovered               | None                      |
|             |         | Acute Hypoxic Respiratory failure (4)    | Possibly related         | Not Recovered               | None                      |
| 106-010     | 6       | Hypertension (3)                         | Definitely related       | Recovered, without sequelae | None                      |
|             |         | Hypertension (3)                         | Probably related         | Recovering                  | None                      |
| 106-011     | 6       | Hypotension (3)                          | Possibly related         | Recovered                   | None                      |
|             |         | Blood bilirubin increased (3)            | Possibly related         | Recovering                  | None                      |

\*Multiple events for the same term and patient have been reported as 1 event only unless same event was reported for 2 different Grades i.e., worsened.

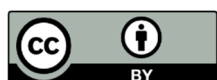

© 2019 by the authors. Licensee MDPI, Basel, Switzerland. This article is an open access article distributed under the terms and conditions of the Creative Commons Attribution (CC BY) license (<http://creativecommons.org/licenses/by/4.0/>).
